# Supplementary material for: A Multimethodological Approach for the Chemical Characterization of Edible Insects: The Case Study of Acheta domesticus
Source: MDPI journal article supplement (doi:10.3390/foods12122331), 2023-06-09
Supplement: s1 [file s1]

*Supplementary Materials*

## **A multimethodological approach for the chemical characterization of edible insects: the case study of *Acheta domesticus***

**Mattia Spano <sup>1,2</sup>, Giacomo Di Matteo <sup>1,2</sup>, Carlos Alberto Fernandez Retamozo <sup>1,2</sup>, Alba Lasalvia <sup>1</sup>, Marco Ruggeri <sup>3</sup>, Giuseppina Sandri <sup>3</sup>, Carlos Cordeiro <sup>4</sup>, Marta Sousa Silva <sup>4</sup>, Carlotta Totaro Fila <sup>5</sup>, Stefania Garzoli <sup>1</sup>, Maria Elisa Crestoni<sup>1</sup>, Luisa Mannina <sup>1,2\*</sup>**

\*Corresponding author: [luisa.mannina@uniroma1.it](mailto:luisa.mannina@uniroma1.it)

**Table S1.** Untargeted metabolic profiling of hydroalcoholic and organic extracts of *A. domesticus* powder.

| #  | Putative Annotation <sup>a</sup>      | Molecular Formula | Theo. m/z <sup>b</sup> | HA1 <sup>c</sup> | HA2 <sup>c</sup> | HA3 <sup>c</sup> | Org1 <sup>c</sup> | Org2 <sup>c</sup> | Org3 <sup>c</sup> |
|----|---------------------------------------|-------------------|------------------------|------------------|------------------|------------------|-------------------|-------------------|-------------------|
| 1  | Phosphocysteamine                     | C2H8NO3PS         | 158.00277              | 2.15 *<br>10-6   | 2.33 * 10-<br>6  | 2.16 *<br>10-3   |                   |                   |                   |
| 2  | Sodium phosphate                      | Na3O4P            | 164.92993              | 3.65 *<br>10-6   | 2.98 * 10-<br>5  | 3.57 *<br>10-4   |                   |                   |                   |
| 3  | cis-4-Decenoic acid                   | C10H18O2          | 171.13803              |                  |                  |                  | 1.60 * 10-<br>5   | 2.16 *<br>10-6    | 1.90 *<br>10-5    |
| 4  | Sulfinioalanine                       | C3H6NO4S          | 174.99097              | 8.70 *<br>10-5   |                  |                  |                   |                   |                   |
| 5  | Arginine                              | C6H14N4O2         | 175.11888              | 3.30 *<br>10-6   | 3.43 * 10-<br>6  | 3.13 *<br>10-6   |                   |                   |                   |
| 6  | Methylenediphosphonic acid            | CH6O6P2           | 176.97062              | 1.92 *<br>10-6   | 2.24 * 10-<br>4  | 2.26 *<br>10-5   |                   |                   | 1.76 *<br>10-4    |
| 7  | Undecynoic acid                       | C11H18O2          | 183.13796              |                  |                  |                  |                   | 1.76 *<br>10-2    | 1.81 *<br>10-2    |
| 8  | Ethylmalate                           | C6H10O5           | 185.04204              | 2.28 *<br>10-5   | 2.23 * 10-<br>2  | 2.18 *<br>10-2   |                   |                   |                   |
| 9  | Methyl-3-decenoic acid                | C11H20O2          | 185.15355              |                  |                  |                  | 3.28 * 10-<br>6   | 4.68 *<br>10-4    | 3.76 *<br>10-4    |
| 10 | Alanylproline                         | C8H14N2O3         | 187.10767              | 2.35 *<br>10-5   | 2.26 * 10-<br>6  | 2.49 *<br>10-6   |                   |                   |                   |
| 11 | Tridecatrienal                        | C13H20O           | 193.15869              |                  |                  |                  |                   | 1.77 *<br>10-2    | 1.57 *<br>10-2    |
| 12 | Shikimic acid                         | C7H10O5           | 197.04204              | 2.73 *<br>10-4   | 3.40 * 10-<br>1  | 2.67 *<br>10-2   |                   |                   |                   |
| 13 | Dihydro-octenyl-furanone              | C12H20O2          | 197.15357              |                  |                  |                  | 4.18 * 10-<br>6   | 4.49 *<br>10-6    | 4.55 *<br>10-6    |
| 14 | Linderic acid                         | C12H22O2          | 199.16926              |                  |                  |                  | 3.12 * 10-<br>2   | 3.91 *<br>10-2    | 4.90 *<br>10-1    |
| 15 | Lauric acid                           | C12H24O2          | 201.18491              |                  |                  | 1.76 *<br>10-2   | 2.73 * 10-<br>2   | 2.70 *<br>10-1    | 2.73 *<br>10-2    |
| 16 | Amino-undecanoic acid                 | C11H23NO2         | 202.18016              | 2.23 *<br>10-5   |                  |                  | 2.30 * 10-<br>7   | 2.26 *<br>10-7    | 2.24 *<br>10-7    |
| 17 | 6-Acetyl-2,2-dimethyl-2H-1-benzopyran | C13H14O2          | 203.10693              |                  | 1.78 * 10-<br>6  | 1.72 *<br>10-5   |                   |                   |                   |
| 18 | Anofinic acid                         | C12H12O3          | 205.08589              |                  |                  |                  | 2.48 * 10-<br>5   | 1.98 *<br>10-6    | 1.98 *<br>10-6    |
| 19 | Tryptophan                            | C11H12N2O2        | 205.09712              | 2.68 *<br>10-5   | 2.72 * 10-<br>4  | 2.95 *<br>10-5   |                   |                   |                   |
| 20 | Tetradecatrienal                      | C14H22O           | 207.17434              |                  |                  |                  |                   | 1.86 *<br>10-2    | 2.45 *<br>10-2    |

|                                                      |           |           |                |                 |                |                 |                |                |
|------------------------------------------------------|-----------|-----------|----------------|-----------------|----------------|-----------------|----------------|----------------|
| <b>21</b> Heptyloxyphenol                            | C13H20O2  | 209.15361 | 4.98 *<br>10-5 | 5.33 * 10-<br>2 | 5.62 *<br>10-2 | 9.87 * 10-<br>2 | 9.54 *<br>10-2 | 1.00E+00       |
| <b>22</b> Homoarginine                               | C7H16N4O2 | 211.11655 | 2.35 *<br>10-3 | 2.30 * 10-<br>1 | 2.27 *<br>10-2 |                 |                |                |
| <b>23</b> Linalyl propionate                         | C13H22O2  | 211.16926 |                |                 |                | 5.80 * 10-<br>4 | 6.70 *<br>10-6 | 7.26 *<br>10-6 |
| <b>24</b>                                            | C12H21NO2 | 212.16451 |                |                 |                | 1.97 * 10-<br>6 | 1.89 *<br>10-6 | 2.40 *<br>10-6 |
| <b>25</b> Methyl-2-dodecenoic acid                   | C13H24O2  | 213.18491 | 1.91 *<br>10-5 |                 |                | 2.73 * 10-<br>2 | 3.88 *<br>10-2 | 3.83 *<br>10-2 |
| <b>26</b>                                            | C12H23NO2 | 214.18015 |                |                 |                |                 | 1.63 *<br>10-6 | 1.76 *<br>10-6 |
| <b>27</b> Trimethylolmelamine                        | C6H12N6O3 | 217.10463 | 8.46 *<br>10-5 | 7.68 * 10-<br>5 | 7.78 *<br>10-5 | 2.48 * 10-<br>6 | 2.24 *<br>10-6 | 2.83 *<br>10-6 |
| <b>28</b> Gluconic acid                              | C6H12O7   | 219.04752 | 3.62 *<br>10-5 | 2.73 * 10-<br>2 | 3.22 *<br>10-2 |                 |                |                |
| <b>29</b> Succimer                                   | C4H6O4S2  | 220.93391 | 1.65 *<br>10-5 |                 |                |                 |                |                |
| <b>30</b> Acetyl-2-hydroxyphenyl-3-methyl-1-butanone | C13H16O3  | 221.11721 |                |                 |                | 1.65 * 10-<br>6 | 1.94 *<br>10-5 | 2.88 *<br>10-5 |
| <b>31</b>                                            | C16H28    | 221.22637 |                |                 |                |                 | 1.89 *<br>10-6 | 1.77 *<br>10-6 |
| <b>32</b> Decenedioic acid                           | C10H16O4  | 223.09408 | 6.90 *<br>10-4 | 7.35 * 10-<br>2 | 6.85 *<br>10-2 | 2.95 * 10-<br>2 | 2.96 *<br>10-2 | 2.58 *<br>10-2 |
| <b>33</b> Annuionone B                               | C13H18O3  | 223.13287 |                |                 |                |                 | 1.63 *<br>10-6 | 1.64 *<br>10-4 |
| <b>34</b> Serine O-sulfate                           | C3H7NO6S  | 223.96257 | 7.24 *<br>10-5 |                 |                |                 |                |                |
| <b>35</b> Phosphoglycerate                           | C3H7O7P   | 224.95610 | 5.87 *<br>10-5 |                 |                |                 |                |                |
| <b>36</b> Sebacic acid                               | C10H18O4  | 225.10973 | 9.69 *<br>10-5 | 9.65 * 10-<br>2 | 9.93 *<br>10-2 | 3.72 * 10-<br>2 | 3.68 *<br>10-2 | 3.99 *<br>10-2 |

| #  | Putative Annotation <sup>a</sup>     | Molecular Formula | Theo. m/z <sup>b</sup> | HA1 <sup>c</sup> | HA2 <sup>c</sup> | HA3 <sup>c</sup> | Org1 <sup>c</sup> | Org2 <sup>c</sup> | Org3 <sup>c</sup> |
|----|--------------------------------------|-------------------|------------------------|------------------|------------------|------------------|-------------------|-------------------|-------------------|
| 37 | Tetradecadienoic acid                | C14H24O2          | 225.18491              |                  |                  |                  | 5.61 * 10-2       | 6.96 * 10-2       | 7.70 * 10-1       |
| 38 |                                      | C8H204S2          | 226.94679              | 4.00 * 10-6      | 2.98 * 10-6      | 2.34 * 10-6      |                   |                   |                   |
| 39 | Diethyl -2-methyl-3-hydroxysuccinate | C9H16O5           | 227.08899              | 1.91 * 10-4      | 1.86 * 10-2      | 1.92 * 10-2      |                   |                   |                   |
| 40 | Myristoleic acid                     | C14H26O2          | 227.20056              | 1.97 * 10-5      | 1.99 * 10-2      |                  | 4.18 * 10-2       | 4.11 * 10-2       | 3.85 * 10-2       |
| 41 |                                      | C13H25NO2         | 228.19579              | 4.66 * 10-6      | 4.97 * 10-6      | 5.97 * 10-6      | 1.93 * 10-7       | 2.13 * 10-7       | 2.31 * 10-7       |
| 42 | Dodecenedioic acid                   | C12H20O4          | 229.14344              |                  |                  |                  | 1.74 * 10-2       | 1.55 * 10-2       | 2.50 * 10-1       |
| 43 | Isoleucylproline                     | C11H20N2O3        | 229.15466              | 2.12 * 10-5      | 2.59 * 10-6      | 2.43 * 10-4      |                   |                   |                   |
| 44 | Myristic acid                        | C14H28O2          | 229.21621              | 6.14 * 10-4      | 6.36 * 10-2      | 6.63 * 10-2      | 1.32 * 10-2       | 1.27 * 10-2       | 1.32 * 10-2       |
| 45 | Xestaminal C                         | C14H31NO          | 230.24784              | 5.82 * 10-6      | 5.80 * 10-6      | 5.83 * 10-6      | 1.84 * 10-5       | 2.22 * 10-5       | 2.11 * 10-4       |
| 46 | Dimethyl-dioxo-dodecatrienal         | C14H18O3          | 235.13287              |                  |                  |                  | 2.14 * 10-2       | 1.97 * 10-2       | 2.24 * 10-2       |
| 47 | S-aminomethylidihydroipoamide        | C9H20N2OS2        | 237.10898              | 4.29 * 10-5      | 4.48 * 10-2      | 4.79 * 10-2      |                   | 1.98 * 10-2       | 1.54 * 10-2       |
| 48 | Heptyloxybenzoic acid                | C14H20O3          | 237.14852              |                  |                  |                  | 1.86 * 10-2       | 1.57 * 10-2       | 1.84 * 10-2       |
| 49 | Methyl lauric acid                   | C13H26O2          | 237.18250              |                  | 2.50 * 10-1      | 2.12 * 10-2      |                   |                   |                   |
| 50 | Hexadecadienal                       | C16H28O           | 237.22129              |                  | 1.83 * 10-2      |                  | 4.78 * 10-2       | 4.29 * 10-2       | 4.18 * 10-2       |
| 51 | Carbamoyl-2-hydroxyethyl guanine     | C8H10N6O3         | 239.08900              | 8.56 * 10-6      | 7.99 * 10-5      | 8.78 * 10-5      | 3.82 * 10-6       | 3.39 * 10-5       | 3.32 * 10-6       |
| 52 | Methoxychalcone                      | C16H14O2          | 239.10666              | 1.84 * 10-5      | 1.92 * 10-2      | 2.70 * 10-1      | 3.96 * 10-2       | 3.78 * 10-2       | 3.62 * 10-2       |
| 53 | Geranyl 3-methylbutanoate            | C15H26O2          | 239.20057              |                  |                  |                  | 2.19 * 10-6       | 2.19 * 10-5       | 2.28 * 10-4       |
| 54 | 3-Methylcyclopentadecanone           | C16H30O           | 239.23694              | 2.01 * 10-6      | 2.13 * 10-6      | 2.13 * 10-6      | 5.30 * 10-6       | 5.67 * 10-6       | 5.73 * 10-6       |
| 55 | Dioscoretine                         | C13H23NO3         | 242.17506              |                  |                  |                  | 1.89 * 10-6       | 1.58 * 10-5       | 1.96 * 10-6       |
| 56 |                                      | C14H27NO2         | 242.21145              |                  |                  | 1.88 * 10-6      | 5.02 * 10-6       | 5.64 * 10-6       | 5.25 * 10-6       |
| 57 | Diethylene glycol dimethacrylate     | C12H18O5          | 243.12271              |                  |                  |                  | 1.88 * 10-6       | 1.76 * 10-6       | 1.79 * 10-5       |
| 58 |                                      | C18H26            | 243.21074              |                  |                  |                  | 3.42 * 10-6       | 3.51 * 10-6       | 3.78 * 10-6       |
| 59 | Methyl myristic acid                 | C15H30O2          | 243.23186              | 5.75 * 10-5      | 6.83 * 10-2      | 6.95 * 10-2      | 1.70 * 10-1       | 1.20 * 10-1       | 9.66 * 10-2       |
| 60 |                                      | C5HN5OS3          | 243.94165              | 4.88 * 10-5      | 4.55 * 10-5      | 3.74 * 10-5      |                   |                   |                   |

|                                                          |             |           |                |                 |                  |            |        |        |
|----------------------------------------------------------|-------------|-----------|----------------|-----------------|------------------|------------|--------|--------|
| <b>61</b> Undecanoylglycine                              | C13H25NO3   | 244.19072 | 10-6<br>2.51 * | 6<br>2.72 * 10- | 10-6<br>3.00E+00 | 5.49 * 10- | 5.60 * | 5.53 * |
| <b>62</b> Dodecatetraenedioic acid                       | C12H14O4    | 245.07843 | 10-4<br>7.33 * | 2               |                  | 2          | 10-1   | 10-2   |
| <b>63</b>                                                | C7H17O7P    | 245.07844 | 10-5<br>7.33 * | 7.56 * 10-      | 6.92 *<br>10-6   | 3.50 * 10- | 3.50 * | 3.10 * |
| <b>64</b> Methyl-tetradecahydrocyclopenta phenanthrene   | C18H28      | 245.22639 | 10-6           | 6               |                  | 2.34 * 10- | 2.75 * | 2.72 * |
| <b>65</b> Dodecylbenzene                                 | C18H30      | 247.24204 |                |                 |                  | 6          | 10-6   | 10-7   |
| <b>66</b> Hydroxyjasmonic acid                           | C12H18O4    | 249.10973 |                |                 |                  | 3.76 * 10- | 4.92 * | 5.75 * |
| <b>67</b> Methyl dihydrojasmonate                        | C13H22O3    | 249.14612 | 3.56 *<br>10-4 |                 | 3.52 *<br>10-2   | 1.63 * 10- |        | 10-6   |
| <b>68</b> Diaminopurine-dideoxyriboside                  | C10H14N6O2  | 251.12539 | 7.98 *<br>10-6 | 8.16 * 10-      | 8.17 *<br>10-5   | 3.34 * 10- | 3.15 * | 3.24 * |
| <b>69</b> Hexadecatetraenoic acid                        | C16H26O2    | 251.20056 | 6.48 *<br>10-6 | 6.12 * 10-      | 6.33 *<br>10-4   | 2.47 * 10- | 2.43 * | 2.84 * |
| <b>70</b> Decanoylglycine                                | C12H23NO3   | 252.15701 |                | 6               |                  | 5          | 10-6   | 10-6   |
| <b>71</b> Cysteinyl-Methionine                           | C8H16N2O3S2 | 253.06826 |                |                 |                  | 1.90 * 10- | 1.58 * |        |
| <b>72</b> Palmitolinoleic acid                           | C16H28O2    | 253.21621 | 5.20 *<br>10-5 | 5.52 * 10-      | 4.62 *<br>10-2   | 2.63 * 10- | 2.89 * | 2.45 * |
| <b>73</b> Methyl-dihydroxy-methylbutyl-4-hydroxybenzoate | C13H18O5    | 255.12273 |                | 1.82 * 10-      | 2.18 *<br>10-5   |            | 10-2   | 10-2   |
|                                                          |             |           |                | 5               | 2.60 *<br>10-1   | 4.30 * 10- | 3.92 * | 3.69 * |
|                                                          |             |           |                |                 |                  | 1          | 10-2   | 10-2   |
|                                                          |             |           |                |                 |                  | 2.80 * 10- | 1.73 * |        |
|                                                          |             |           |                |                 |                  | 5          | 10-5   |        |

---

| #  | Putative Annotation <sup>a</sup>          | Molecular Formula | Theo. m/z <sup>b</sup> | HA1 <sup>c</sup> | HA2 <sup>c</sup> | HA3 <sup>c</sup> | Org1 <sup>c</sup> | Org2 <sup>c</sup> | Org3 <sup>c</sup> |
|----|-------------------------------------------|-------------------|------------------------|------------------|------------------|------------------|-------------------|-------------------|-------------------|
| 74 | Heptadecanal                              | C17H34O           | 255.26825              |                  |                  | 1.86 *<br>10-5   | 2.24 * 10-<br>5   | 2.27 *<br>10-5    | 2.50 *<br>10-5    |
| 75 |                                           | C7H5N5S3          | 255.97804              | 3.19 *<br>10-6   | 2.30 * 10-<br>6  | 1.83 *<br>10-6   |                   |                   |                   |
| 76 | Palmitamide                               | C16H33NO          | 256.26349              |                  |                  |                  | 6.80 * 10-<br>1   | 6.63 *<br>10-2    | 6.14 *<br>10-2    |
| 77 |                                           | C17H37N           | 256.29989              | 3.29 *<br>10-7   | 3.11 * 10-<br>7  | 3.07 *<br>10-7   | 2.24 * 10-<br>7   | 2.17 *<br>10-7    | 2.05 *<br>10-7    |
| 78 | Methoxy-trimethoxyphenyl-2-propanol       | C13H20O5          | 257.13836              |                  |                  |                  | 1.67 * 10-<br>6   | 1.62 *<br>10-6    | 1.57 *<br>10-6    |
| 79 | Valerenic acid                            | C15H22O2          | 257.15120              | 6.91 *<br>10-5   | 6.41 * 10-<br>2  | 6.35 *<br>10-2   | 2.69 * 10-<br>2   | 2.38 *<br>10-2    | 2.29 *<br>10-2    |
| 80 | Hexadecatrienal                           | C16H26O           | 257.18759              | 4.23 *<br>10-5   | 4.11 * 10-<br>2  | 4.70 *<br>10-1   |                   |                   |                   |
| 81 | Palmitic acid                             | C16H32O2          | 257.24751              | 3.56 *<br>10-5   | 4.29 * 10-<br>2  | 4.91 *<br>10-2   | 1.94 * 10-<br>2   | 2.13 *<br>10-2    | 2.21 *<br>10-2    |
| 82 | Hexenoylcarnitine                         | C13H23NO4         | 258.16998              | 9.14 *<br>10-5   | 8.94 * 10-<br>2  | 8.50 *<br>10-1   | 1.21 * 10-<br>2   | 1.90 *<br>10-1    | 1.14 *<br>10-2    |
| 83 | Lauroylglycine                            | C14H27NO3         | 258.20637              |                  |                  |                  |                   | 1.93 *<br>10-2    | 1.55 *<br>10-2    |
| 84 |                                           | C16H35NO          | 258.27915              | 3.57 *<br>10-6   | 3.52 * 10-<br>6  | 3.73 *<br>10-6   |                   |                   |                   |
| 85 | Tetradecanedioic acid                     | C14H26O4          | 259.19039              |                  |                  |                  | 2.28 * 10-<br>2   | 1.96 *<br>10-2    | 1.86 *<br>10-2    |
| 86 | Glucose 1-phosphate                       | C6H13O9P          | 261.03700              |                  |                  |                  | 2.93 * 10-<br>2   | 1.60 *<br>10-1    |                   |
| 87 | Carboxy-methyl-propyl-furanpropanoic acid | C12H16O5          | 263.08899              | 2.73 *<br>10-5   |                  |                  |                   |                   |                   |
| 88 |                                           | C7H19O8P          | 263.08900              | 2.73 *<br>10-6   | 2.53 * 10-<br>6  | 2.58 *<br>10-6   |                   |                   |                   |
| 89 | Phosphatidylglycerol                      | C8H23O7P          | 263.12538              | 3.21 *<br>10-6   | 2.99 * 10-<br>6  | 3.48 *<br>10-6   |                   |                   |                   |
| 90 | Tridecenyl acetate                        | C15H28O2          | 263.19815              | 2.88 *<br>10-5   | 3.48 * 10-<br>2  | 3.20 *<br>10-1   |                   |                   |                   |
| 91 | Dodecylphenol                             | C18H30O           | 263.23694              |                  |                  |                  | 1.16 * 10-<br>2   | 1.38 *<br>10-2    | 1.44 *<br>10-2    |
| 92 | Hydroxy-1-(4-hydroxyphenyl)-3-decanone    | C16H24O3          | 265.17982              |                  |                  |                  | 1.91 * 10-<br>2   | 1.63 *<br>10-2    |                   |
| 93 | Octadecadienal                            | C18H32O           | 265.25259              |                  |                  |                  | 1.79 * 10-<br>2   | 2.51 *<br>10-2    | 2.99 *<br>10-2    |
| 94 | Aminopurin-9-yl_purin-2-amine             | C10H8N10          | 269.09957              | 3.62 *<br>10-6   | 3.69 * 10-<br>5  | 3.25 *<br>10-5   | 1.77 * 10-<br>5   | 1.65 *<br>10-6    |                   |
| 95 | Kamahine C                                | C14H20O5          | 269.13838              |                  |                  |                  |                   | 1.73 *<br>10-6    | 1.78 *<br>10-4    |
| 96 | Methyl-hexadecenoic acid                  | C17H32O2          | 269.24751              |                  | 1.76 * 10-<br>2  | 1.93 *<br>10-2   | 3.88 * 10-<br>2   | 3.50 *<br>10-1    | 3.47 *<br>10-2    |
| 97 |                                           | C8H7N5S3          | 269.99371              | 2.08 *           | 1.73 * 10-       |                  |                   |                   |                   |

|                                                                                      |           |           |             |             |             |             |             |             |  |
|--------------------------------------------------------------------------------------|-----------|-----------|-------------|-------------|-------------|-------------|-------------|-------------|--|
|                                                                                      |           |           | 10-6        | 6           |             |             |             |             |  |
| 98 Capsiamide                                                                        | C17H35NO  | 270.27916 | 2.55 *      | 2.74 * 10-5 | 2.43 * 10-5 | 2.87 * 10-6 | 2.45 * 10-6 | 2.59 * 10-5 |  |
| 99 Prenyl glucoside                                                                  | C11H20O6  | 271.11522 | 1.12 * 10-7 | 1.51 * 10-6 | 1.99 * 10-5 | 5.85 * 10-5 | 5.56 * 10-6 | 4.90 * 10-6 |  |
| 100 1,5-Dihydro-7- <sub>1</sub> -piperidinyl_-imidazo_2,1-b<br>_quinazolin-2_3H_-one | C15H18N4O | 271.15401 |             |             | 1.75 * 10-6 |             | 2.58 * 10-6 | 2.04 * 10-6 |  |
| 101 Keto palmitic acid                                                               | C16H30O3  | 271.22677 |             | 1.72 * 10-2 | 1.73 * 10-2 | 3.51 * 10-2 | 3.25 * 10-2 | 3.49 * 10-2 |  |
| 102 Heptadecanoic acid                                                               | C17H34O2  | 271.26317 | 6.79 * 10-6 | 8.14 * 10-6 | 8.78 * 10-6 | 2.97 * 10-7 | 3.25 * 10-7 | 3.40 * 10-7 |  |
| 103 Hept-3-enoylcarnitine                                                            | C14H25NO4 | 272.18565 | 2.93 * 10-4 | 2.98 * 10-6 | 3.12 * 10-4 | 2.81 * 10-6 | 2.97 * 10-6 | 3.59 * 10-4 |  |
| 104 Amino-hexadecanoic acid                                                          | C16H33NO2 | 272.25841 | 4.65 * 10-5 | 4.46 * 10-2 | 4.74 * 10-2 | 3.19 * 10-2 | 2.88 * 10-2 | 3.10 * 10-1 |  |
| 105 Phosphosulfolactate                                                              | C3H7O9PS  | 272.94406 | 4.00 * 10-5 | 3.60 * 10-1 | 2.18 * 10-2 |             |             |             |  |
| 106 Ubiquinone-1                                                                     | C14H18O4  | 273.10975 | 7.62 * 10-6 | 7.86 * 10-6 | 8.25 * 10-6 | 3.75 * 10-5 | 4.49 * 10-4 | 3.88 * 10-6 |  |
| 107 Absciscic alcohol                                                                | C15H22O3  | 273.14612 | 2.44 * 10-5 |             |             |             |             |             |  |
| 108                                                                                  | C10H25O6P | 273.14613 | 2.44 * 10-6 | 2.50 * 10-6 | 2.44 * 10-6 |             |             |             |  |
| 109 Hydroxyhex-4-enoylcarnitine                                                      | C13H23NO5 | 274.16493 |             |             |             | 1.65 * 10-6 | 2.00 * 10-6 | 1.77 * 10-5 |  |
| 110                                                                                  | C16H35NO2 | 274.27409 |             |             |             | 2.37 * 10-6 | 2.70 * 10-6 | 2.88 * 10-6 |  |

---

| #   | Putative Annotation <sup>a</sup>         | Molecular Formula | Theo. m/z <sup>b</sup> | HA1 <sup>c</sup> | HA2 <sup>c</sup> | HA3 <sup>c</sup> | Org1 <sup>c</sup> | Org2 <sup>c</sup> | Org3 <sup>c</sup> |
|-----|------------------------------------------|-------------------|------------------------|------------------|------------------|------------------|-------------------|-------------------|-------------------|
| 111 | Methyl-D-erythritol-2,4-cyclodiphosphate | C5H10O9P2         | 276.98671              | 8.64 *<br>10-6   | 6.47 * 10-<br>5  | 5.32 *<br>10-5   | 2.24 * 10-<br>5   | 1.88 *<br>10-6    | 2.25 *<br>10-5    |
| 112 | Palmitoleic acid                         | C16H30O2          | 277.21380              | 1.32 *<br>10-5   | 1.52 * 10-<br>2  | 1.62 *<br>10-2   | 9.31 * 10-<br>2   | 8.94 *<br>10-2    | 9.12 *<br>10-2    |
| 113 | Leucyl-phenylalanine                     | C15H22N2O3        | 279.17032              |                  | 1.71 * 10-<br>2  |                  | 2.90 * 10-<br>1   | 2.70 *<br>10-1    | 1.62 *<br>10-2    |
| 114 | Sodium palmitate                         | C16H31NaO2        | 279.22828              |                  |                  |                  | 3.27 * 10-<br>6   | 3.55 *<br>10-6    | 3.55 *<br>10-6    |
| 115 |                                          | C18H30O2          | 279.23188              |                  |                  |                  | 1.03 * 10-<br>8   | 1.14 *<br>10-8    | 1.18 *<br>10-8    |
| 116 | Glycerophosphocholine                    | C8H20NO6P         | 280.09204              | 4.42 *<br>10-5   | 3.80 * 10-<br>1  | 4.26 *<br>10-2   |                   |                   |                   |
| 117 | Linoleamide                              | C18H33NO          | 280.26349              |                  |                  |                  | 2.54 * 10-<br>2   | 2.65 *<br>10-2    | 2.59 *<br>10-2    |
| 118 | Methionyl-Methionine                     | C10H20N2O3S2      | 281.09958              | 6.93 *<br>10-4   | 5.33 * 10-<br>6  | 5.19 *<br>10-6   | 3.97 * 10-<br>5   |                   |                   |
| 119 | Linoleic acid                            | C18H32O2          | 281.24751              |                  | 2.35 * 10-<br>2  | 2.43 *<br>10-2   | 2.84 * 10-<br>2   | 3.41 *<br>10-2    | 3.67 *<br>10-2    |
| 120 | Oleamide                                 | C18H35NO          | 282.27914              |                  |                  | 1.78 *<br>10-2   | 2.33 * 10-<br>2   | 2.32 *<br>10-2    | 2.36 *<br>10-2    |
| 121 | Arabinopyranobiose                       | C10H18O9          | 283.10275              | 2.38 *<br>10-6   | 2.72 * 10-<br>5  | 2.89 *<br>10-6   |                   |                   | 5.32 *<br>10-5    |
| 122 | Octyl gallate                            | C15H22O5          | 283.15402              | 1.64 *<br>10-5   |                  | 1.68 *<br>10-6   | 3.12 * 10-<br>5   | 3.88 *<br>10-5    | 2.78 *<br>10-6    |
| 123 | Oleic acid                               | C18H34O2          | 283.26316              | 4.23 *<br>10-4   | 6.50 * 10-<br>1  | 6.12 *<br>10-2   | 9.49 * 10-<br>2   | 1.39 *<br>10-2    | 1.63 *<br>10-2    |
| 124 | Stearamide                               | C18H37NO          | 284.29479              |                  |                  |                  | 3.71 * 10-<br>2   | 4.60 *<br>10-1    | 4.75 *<br>10-2    |
| 125 |                                          | C19H41N           | 284.33119              | 1.98 *<br>10-7   | 1.87 * 10-<br>7  | 1.92 *<br>10-7   | 5.71 * 10-<br>6   | 5.75 *<br>10-6    | 6.01 *<br>10-6    |
| 126 | α-dihydroartemisinin                     | C15H24O5          | 285.16967              |                  |                  |                  | 2.01 * 10-<br>6   | 1.72 *<br>10-6    | 1.98 *<br>10-6    |
| 127 | Stearic acid                             | C18H36O2          | 285.27881              | 1.42 *<br>10-5   | 1.51 * 10-<br>2  | 1.69 *<br>10-2   | 3.38 * 10-<br>2   | 4.50 *<br>10-1    | 5.57 *<br>10-2    |
| 128 | Octenoylcarnitine                        | C15H27NO4         | 286.20128              | 4.69 *<br>10-4   | 4.60 * 10-<br>1  | 4.10 *<br>10-1   | 5.39 * 10-<br>2   | 4.89 *<br>10-2    | 4.67 *<br>10-2    |
| 129 | Phlorin                                  | C12H16O8          | 289.09182              |                  |                  |                  | 7.52 * 10-<br>6   | 5.92 *<br>10-6    | 4.89 *<br>10-6    |
| 130 | Xanthoxic acid                           | C15H22O4          | 289.14103              | 1.81 *<br>10-4   |                  |                  |                   |                   |                   |
| 132 |                                          | C12H26O5          | 289.14104              | 1.81 *<br>10-6   | 1.74 * 10-<br>6  | 2.07 *<br>10-6   |                   |                   |                   |
| 133 | Arginylasparagine                        | C10H20N6O4        | 289.16217              | 1.73 *<br>10-5   | 1.71 * 10-<br>6  |                  |                   |                   |                   |
| 134 |                                          | C8H20NO8P         | 290.09991              | 3.16 *<br>10-6   | 3.53 * 10-<br>6  | 3.08 *<br>10-6   |                   |                   |                   |
| 135 |                                          | C9H23O8P          | 291.12030              | 3.73 *<br>10-6   | 3.68 * 10-<br>6  | 3.53 *<br>10-6   |                   |                   |                   |



|                                        |            |           |                |                 |                |                 |                |                |
|----------------------------------------|------------|-----------|----------------|-----------------|----------------|-----------------|----------------|----------------|
| <b>136</b>                             | C16H28O3   | 291.19308 | 10-6<br>1.98 * | 6<br>2.65 * 10- | 10-6<br>2.72 * |                 |                |                |
| <b>137</b> Oxo-octadecatetraenoic acid | C18H26O3   | 291.19547 | 10-6           | 6               | 10-6           | 1.86 * 10-<br>2 | 1.71 *<br>10-2 | 1.54 *<br>10-2 |
| <b>138</b>                             | C7H5N3O4S3 | 291.95124 | 4.04 *<br>10-7 | 2.81 * 10-<br>7 | 2.35 *<br>10-7 | 3.18 * 10-<br>7 | 2.51 *<br>10-7 | 2.17 *<br>10-7 |
| <b>139</b> N-Propionylprocainamide     | C16H25N3O2 | 292.20130 |                |                 |                | 1.61 * 10-<br>5 | 1.70 *<br>10-5 |                |
| <b>140</b>                             | C8H21O9P   | 293.09957 | 2.39 *<br>10-6 | 2.40 * 10-<br>6 | 2.05 *<br>10-6 |                 |                |                |
| <b>141</b> Histidylhistidine           | C12H16N6O3 | 293.13597 | 6.20 *<br>10-6 | 6.56 * 10-<br>5 | 7.22 *<br>10-4 | 3.29 * 10-<br>3 | 2.57 *<br>10-6 | 2.86 *<br>10-6 |
| <b>142</b> N-Deoxy-1-fructosyl leucine | C12H23NO7  | 294.15475 |                |                 | 1.74 *<br>10-5 | 2.57 * 10-<br>6 | 2.59 *<br>10-6 | 2.75 *<br>10-6 |
| <b>143</b> Tridecanoylglycine          | C15H29NO3  | 294.20396 | 5.96 *<br>10-4 | 4.50 * 10-<br>1 | 5.29 *<br>10-2 | 1.94 * 10-<br>2 |                |                |
| <b>144</b>                             | C7H4N4O2S3 | 294.93889 | 8.78 *<br>10-7 | 6.45 * 10-<br>7 | 5.53 *<br>10-7 |                 |                |                |
| <b>145</b>                             | C13H20O6   | 295.11522 | 8.60 *<br>10-6 | 8.43 * 10-<br>6 | 9.54 *<br>10-6 | 5.06 * 10-<br>6 | 4.18 *<br>10-6 | 4.30 *<br>10-6 |
| <b>146</b> Puromycin aminonucleoside   | C12H18N6O3 | 295.15162 | 6.92 *<br>10-6 | 6.41 * 10-<br>6 | 5.77 *<br>10-6 | 4.39 * 10-<br>3 | 3.34 *<br>10-6 | 3.46 *<br>10-6 |
| <b>147</b> Hydroxylinolenic acid       | C18H30O3   | 295.22677 |                |                 |                | 3.93 * 10-<br>2 | 4.10 *<br>10-1 | 3.51 *<br>10-2 |
| <b>148</b>                             | C15H31NO3  | 296.21964 | 5.72 *<br>10-6 | 6.27 * 10-<br>6 | 6.49 *<br>10-6 | 5.29 * 10-<br>6 | 5.15 *<br>10-6 | 4.72 *<br>10-6 |

| #   | Putative Annotation <sup>a</sup> | Molecular Formula | Theo. m/z <sup>b</sup> | HA1 <sup>c</sup>        | HA2 <sup>c</sup>        | HA3 <sup>c</sup>        | Org1 <sup>c</sup>       | Org2 <sup>c</sup>       | Org3 <sup>c</sup>       |
|-----|----------------------------------|-------------------|------------------------|-------------------------|-------------------------|-------------------------|-------------------------|-------------------------|-------------------------|
| 149 |                                  | C17H29NO3         | 296.22207              |                         |                         |                         | 1.93 * 10 <sup>-6</sup> | 1.80 * 10 <sup>-6</sup> | 1.95 * 10 <sup>-6</sup> |
| 150 |                                  | C18H33NO2         | 296.25843              |                         |                         |                         | 1.17 * 10 <sup>-7</sup> | 1.37 * 10 <sup>-7</sup> | 1.53 * 10 <sup>-7</sup> |
| 151 |                                  | C11H20O5S2        | 297.08244              |                         |                         |                         | 1.76 * 10 <sup>-6</sup> | 1.98 * 10 <sup>-6</sup> | 1.67 * 10 <sup>-6</sup> |
| 152 | Deoxynivalenol                   | C15H20O6          | 297.13328              |                         |                         |                         | 1.94 * 10 <sup>-6</sup> | 1.75 * 10 <sup>-6</sup> | 2.12 * 10 <sup>-4</sup> |
| 153 | Dodecanoyl-sn-glycerol           | C15H30O4          | 297.20363              | 1.12 * 10 <sup>-5</sup> | 1.50 * 10 <sup>-1</sup> | 1.60 * 10 <sup>-1</sup> | 1.75 * 10 <sup>-2</sup> | 1.58 * 10 <sup>-2</sup> | 1.87 * 10 <sup>-2</sup> |
| 154 |                                  | C16H34O3          | 297.24004              | 7.94 * 10 <sup>-6</sup> | 8.15 * 10 <sup>-6</sup> | 8.38 * 10 <sup>-6</sup> | 2.09 * 10 <sup>-6</sup> |                         | 1.67 * 10 <sup>-6</sup> |
| 155 | Hydroxy-linoleic acid            | C18H32O3          | 297.24242              |                         |                         |                         | 5.61 * 10 <sup>-2</sup> | 5.97 * 10 <sup>-2</sup> | 5.94 * 10 <sup>-2</sup> |
| 156 | Phytol                           | C20H40O           | 297.31519              |                         |                         |                         | 1.71 * 10 <sup>-2</sup> | 1.82 * 10 <sup>-2</sup> |                         |
| 157 | Palmitoleylethanolamide          | C18H35NO2         | 298.27408              |                         |                         |                         | 4.23 * 10 <sup>-6</sup> | 5.60 * 10 <sup>-7</sup> | 6.46 * 10 <sup>-7</sup> |
| 158 | Aminoguanosine                   | C10H14N6O5        | 299.11014              | 2.33 * 10 <sup>-4</sup> | 2.72 * 10 <sup>-6</sup> | 2.40 * 10 <sup>-6</sup> |                         |                         |                         |
| 159 | Toxin T2 tetrol                  | C15H22O6          | 299.14894              |                         |                         |                         | 2.02 * 10 <sup>-6</sup> | 0.00E+00                | 1.76 * 10 <sup>-6</sup> |
| 160 |                                  | C12H27O6P         | 299.16179              | 1.30 * 10 <sup>-7</sup> | 1.24 * 10 <sup>-7</sup> | 1.26 * 10 <sup>-7</sup> | 5.72 * 10 <sup>-6</sup> | 5.72 * 10 <sup>-6</sup> | 5.28 * 10 <sup>-6</sup> |
| 161 |                                  | C16H26O3S         | 299.16757              |                         |                         |                         | 4.12 * 10 <sup>-6</sup> | 3.52 * 10 <sup>-6</sup> | 3.25 * 10 <sup>-6</sup> |
| 162 | Methyl stearic acid              | C19H38O2          | 299.29446              |                         |                         |                         | 3.12 * 10 <sup>-2</sup> | 4.22 * 10 <sup>-2</sup> | 5.30 * 10 <sup>-1</sup> |
| 163 |                                  | C12H29NO7         | 300.20169              |                         |                         |                         |                         | 2.00 * 10 <sup>-6</sup> | 1.90 * 10 <sup>-6</sup> |
| 164 | Non-2-enoylcarnitine             | C16H29NO4         | 300.21695              | 5.86 * 10 <sup>-5</sup> | 5.86 * 10 <sup>-6</sup> | 6.52 * 10 <sup>-6</sup> | 6.12 * 10 <sup>-5</sup> | 5.44 * 10 <sup>-6</sup> | 5.74 * 10 <sup>-6</sup> |
| 165 | Sphingosine                      | C18H37NO2         | 300.28971              | 3.72 * 10 <sup>-4</sup> | 4.64 * 10 <sup>-2</sup> | 3.73 * 10 <sup>-2</sup> | 7.10 * 10 <sup>-1</sup> | 1.90 * 10 <sup>-1</sup> | 1.33 * 10 <sup>-2</sup> |
| 166 |                                  | C8H14N4O7         | 301.07529              | 1.69 * 10 <sup>-7</sup> | 1.82 * 10 <sup>-7</sup> | 1.73 * 10 <sup>-7</sup> | 8.20 * 10 <sup>-6</sup> | 7.66 * 10 <sup>-6</sup> | 8.28 * 10 <sup>-6</sup> |
| 167 | α-tocopheronolactone             | C16H22O4          | 301.14103              | 4.57 * 10 <sup>-3</sup> | 4.21 * 10 <sup>-2</sup> | 4.70 * 10 <sup>-1</sup> | 1.99 * 10 <sup>-2</sup> | 1.87 * 10 <sup>-2</sup> | 2.00E+00                |
| 168 | Panaxytriol                      | C17H26O3          | 301.17742              | 1.18 * 10 <sup>-5</sup> |                         |                         |                         |                         |                         |
| 169 |                                  | C12H29O6P         | 301.17744              | 1.18 * 10 <sup>-7</sup> | 1.20 * 10 <sup>-7</sup> | 1.17 * 10 <sup>-7</sup> | 4.55 * 10 <sup>-6</sup> | 4.97 * 10 <sup>-6</sup> | 4.62 * 10 <sup>-6</sup> |
| 170 |                                  | C15H28NO3P        | 302.18792              | 2.48 * 10 <sup>-6</sup> | 2.56 * 10 <sup>-6</sup> | 2.81 * 10 <sup>-6</sup> | 2.74 * 10 <sup>-6</sup> | 2.33 * 10 <sup>-6</sup> | 2.41 * 10 <sup>-6</sup> |
| 171 |                                  | C10H27N3O7        | 302.19204              | 3.86 * 10 <sup>-6</sup> | 4.05 * 10 <sup>-6</sup> | 4.08 * 10 <sup>-6</sup> | 3.74 * 10 <sup>-6</sup> | 3.52 * 10 <sup>-6</sup> | 3.18 * 10 <sup>-6</sup> |
| 172 | Hydroxy-cis-5-octenoylcarnitine  | C15H27NO5         | 302.19622              | 1.17 * 10 <sup>-6</sup> | 1.62 * 10 <sup>-6</sup> | 1.79 * 10 <sup>-6</sup> | 1.15 * 10 <sup>-6</sup> | 1.64 * 10 <sup>-6</sup> | 1.38 * 10 <sup>-6</sup> |

|                                             |             |           |        |             |             |             |        |        |
|---------------------------------------------|-------------|-----------|--------|-------------|-------------|-------------|--------|--------|
|                                             |             |           | 10-6   | 7           | 10-7        | 8           | 10-6   | 10-7   |
| <b>173</b> Phaseic acid                     | C15H20O5    | 303.12029 | 3.45 * | 2.65 * 10-5 | 2.92 * 10-2 |             |        |        |
| <b>174</b>                                  | C11H27O7P   | 303.15671 | 2.07 * | 1.75 * 10-6 |             |             |        |        |
| <b>175</b>                                  | C14H30N4OS  | 303.22113 |        |             |             | 6.00 * 10-6 | 7.49 * | 7.90 * |
| <b>176</b> MG(0:0/14:0/0:0)                 | C17H34O4    | 303.25299 |        |             |             | 3.44 * 10-2 | 3.17 * | 3.47 * |
| <b>177</b>                                  | C21H37N     | 304.29990 | 1.65 * | 1.74 * 10-8 | 1.73 * 10-8 | 3.67 * 10-8 | 3.47 * | 3.39 * |
| <b>178</b> 3-O-methyl-epicatechin           | C16H16O6    | 305.10316 | 1.68 * |             | 1.75 * 10-6 | 2.11 * 10-4 |        | 1.60 * |
| <b>179</b> N4-Acetylsulfamonomethoxine      | C13H14N4O3S | 307.08532 | 5.29 * | 4.87 * 10-5 | 4.83 * 10-5 | 3.91 * 10-6 | 3.94 * | 3.62 * |
| <b>180</b>                                  | C9H23O9P    | 307.11523 | 3.23 * | 3.65 * 10-6 | 3.45 * 10-6 |             |        |        |
| <b>181</b> β-D-Glucopyranosyloxy-3-octanone | C14H26O7    | 307.17395 | 2.89 * | 2.82 * 10-5 | 2.49 * 10-5 | 3.89 * 10-6 | 2.89 * | 2.95 * |
| <b>182</b> N-Ethylcarboxamidoadenosine      | C12H16N6O4  | 309.13088 | 8.43 * | 7.66 * 10-6 | 7.76 * 10-6 | 3.98 * 10-5 | 3.85 * | 3.90 * |
| <b>183</b> Lauroyl diethanolamide           | C16H33NO3   | 310.23528 | 1.53 * | 1.47 * 10-7 | 1.42 * 10-7 |             |        |        |
| <b>184</b> N-Hexadecanoylpyrrolidine        | C20H39NO    | 310.31047 |        |             |             | 4.27 * 10-5 | 4.54 * | 5.57 * |
| <b>185</b> Karwinaphthol B                  | C17H20O4    | 311.12538 | 3.62 * |             |             |             | 10-5   | 10-6   |
|                                             |             |           | 10-5   |             |             |             |        |        |

---

| #   | Putative Annotation <sup>a</sup> | Molecular Formula | Theo. m/z <sup>b</sup> | HA1 <sup>c</sup> | HA2 <sup>c</sup> | HA3 <sup>c</sup> | Org1 <sup>c</sup> | Org2 <sup>c</sup> | Org3 <sup>c</sup> |
|-----|----------------------------------|-------------------|------------------------|------------------|------------------|------------------|-------------------|-------------------|-------------------|
| 186 |                                  | C10H20N6O2S       | 311.12636              | 3.62 *<br>10-7   | 3.39 * 10-<br>7  | 3.26 *<br>10-7   |                   |                   |                   |
| 187 |                                  | C14H24O6          | 311.14653              | 1.02 *<br>10-7   | 1.10 * 10-<br>7  | 1.09 *<br>10-7   | 4.67 * 10-<br>6   | 4.02 *<br>10-6    | 4.10 *<br>10-6    |
| 188 | Hydroxysterculic acid            | C19H34O3          | 311.25810              |                  |                  |                  | 2.33 * 10-<br>6   | 2.52 *<br>10-6    | 2.59 *<br>10-6    |
| 189 | Methionyl-Tyrosine               | C14H20N2O4S       | 313.12215              | 1.82 *<br>10-6   | 1.92 * 10-<br>5  |                  |                   |                   |                   |
| 190 | N-Undecylbenzenesulfonic acid    | C17H28O3S         | 313.18320              | 1.75 *<br>10-5   | 2.60 * 10-<br>6  | 3.89 *<br>10-4   |                   |                   |                   |
| 191 | Oxo-nonadecanoic acid            | C19H36O3          | 313.27372              | 3.81 *<br>10-5   |                  |                  | 4.22 * 10-<br>7   | 4.04 *<br>10-7    | 3.98 *<br>10-7    |
| 192 | Gingerdione                      | C17H24O4          | 315.15668              | 4.17 *<br>10-5   | 3.26 * 10-<br>2  | 3.71 *<br>10-2   |                   |                   |                   |
| 193 | Octanol glucoside                | C14H28O6          | 315.17782              | 2.26 *<br>10-5   | 2.95 * 10-<br>4  | 2.18 *<br>10-6   |                   |                   |                   |
| 194 | Octadecanedioic acid             | C18H34O4          | 315.25299              |                  |                  |                  | 1.67 * 10-<br>2   | 1.82 *<br>10-2    | 1.68 *<br>10-2    |
| 195 | Hydroxypristanic acid            | C19H38O3          | 315.28940              |                  |                  |                  | 2.97 * 10-<br>6   | 5.18 *<br>10-6    | 5.65 *<br>10-5    |
| 196 | Oct-6-enedioylcarnitine          | C15H25NO6         | 316.17550              | 3.36 *<br>10-5   | 3.56 * 10-<br>6  | 3.36 *<br>10-6   | 4.76 * 10-<br>6   | 4.71 *<br>10-5    | 4.49 *<br>10-6    |
| 197 | Hydroxynon-2-enoylcarnitine      | C16H29NO5         | 316.21188              | 3.19 *<br>10-6   | 3.30 * 10-<br>5  | 3.26 *<br>10-7   | 2.97 * 10-<br>7   | 2.84 *<br>10-7    | 2.77 *<br>10-7    |
| 198 | Gibberellin A9                   | C19H24O4          | 317.17474              | 1.98 *<br>10-5   | 3.41 * 10-<br>2  | 3.26 *<br>10-2   |                   |                   |                   |
| 199 |                                  | C12H29N3S2        | 318.14365              | 2.93 *<br>10-6   | 2.64 * 10-<br>6  | 3.35 *<br>10-6   |                   |                   |                   |
| 200 |                                  | C12H21N7O2        | 318.16493              |                  |                  |                  | 3.85 * 10-<br>6   | 4.49 *<br>10-6    | 3.97 *<br>10-6    |
| 201 | Suberoyl-L-carnitine             | C15H27NO6         | 318.19113              |                  |                  |                  | 3.21 * 10-<br>5   | 3.44 *<br>10-6    | 3.85 *<br>10-5    |
| 202 | N-methyl arachidonoyl amine      | C21H35NO          | 318.27914              | 5.47 *<br>10-5   |                  |                  | 1.47 * 10-<br>7   | 1.35 *<br>10-7    | 1.28 *<br>10-7    |
| 203 | α-tocopheronic acid              | C16H24O5          | 319.15159              | 2.20 *<br>10-3   |                  |                  |                   |                   |                   |
| 204 |                                  | C11H27O8P         | 319.15163              | 2.00 *<br>10-6   | 2.37 * 10-<br>6  | 2.08 *<br>10-6   |                   |                   |                   |
| 205 |                                  | C13H28O7          | 319.17274              | 3.34 *<br>10-6   | 3.10 * 10-<br>6  | 3.24 *<br>10-6   |                   |                   |                   |
| 206 |                                  | C21H37NO          | 320.29482              | 5.96 *<br>10-6   | 5.90 * 10-<br>6  | 7.01 *<br>10-6   | 1.45 * 10-<br>7   | 1.42 *<br>10-7    | 1.39 *<br>10-7    |
| 207 | Keto stearic acid                | C18H34O3          | 321.24002              | 9.83 *<br>10-5   | 1.12 * 10-<br>2  | 1.13 *<br>10-2   | 7.95 * 10-<br>2   | 7.46 *<br>10-2    | 7.51 *<br>10-2    |
| 208 |                                  | C8H10N4O6S2       | 323.01145              | 3.61 *<br>10-6   | 1.73 * 10-<br>6  |                  |                   |                   |                   |
| 209 | Isococculidine                   | C18H23NO2         | 324.13604              |                  |                  |                  | 1.85 * 10-        | 2.19 *            |                   |

|                                                  |            |           |        |            |        |            |      |        |        |
|--------------------------------------------------|------------|-----------|--------|------------|--------|------------|------|--------|--------|
| <b>210</b> Fructofuranose-dianhydride            | C12H20O10  | 325.11292 | 4.12 * | 2.50 * 10- | 2.84 * | 2.37 * 10- | 2    | 10-2   |        |
|                                                  |            |           | 10-5   | 1          | 10-2   | 2          | 10-2 | 1.78 * | 1.47 * |
| <b>211</b> Lactapiperanol D                      | C18H28O5   | 325.20097 |        |            |        | 1.95 * 10- | 6    | 10-5   | 1.62 * |
| <b>212</b>                                       | C22H47N    | 326.37815 | 4.58 * | 4.49 * 10- | 4.55 * | 1.04 * 10- | 7    | 9.85 * | 8.62 * |
|                                                  |            |           | 10-6   | 6          | 10-6   | 7          | 10-6 | 10-6   | 10-6   |
| <b>213</b>                                       | C14H24O7   | 327.14145 | 7.55 * | 6.62 * 10- | 5.70 * | 3.85 * 10- | 6    | 3.72 * | 3.48 * |
|                                                  |            |           | 10-6   | 6          | 10-6   | 6          | 10-6 | 10-6   | 10-6   |
| <b>214</b> Alkaloid                              | C19H22N2O3 | 327.17140 | 4.75 * | 4.09 * 10- | 5.10 * | 6.21 * 10- | 6    |        |        |
|                                                  |            |           | 10-6   | 6          | 10-6   | 6          |      |        |        |
| <b>215</b> Calcium octanoate                     | C16H30CaO4 | 327.18430 |        | 1.98 * 10- | 2.31 * |            |      |        |        |
|                                                  |            |           |        | 6          | 10-6   |            |      |        |        |
| <b>216</b> Dodecylbenzenesulfonic acid           | C18H30O3S  | 327.19886 |        | 2.43 * 10- | 2.83 * | 1.33 * 10- | 5    | 1.17 * | 1.14 * |
|                                                  |            |           |        | 5          | 10-5   | 5          | 10-6 | 10-7   | 10-7   |
| <b>217</b> Acetoxo-2-hydroxy-16-heptadecen-4-one | C19H34O4   | 327.25302 |        |            |        | 1.83 * 10- | 5    | 2.26 * | 1.85 * |
|                                                  |            |           |        |            |        | 5          | 10-6 | 10-5   | 10-5   |
| <b>218</b>                                       | C20H38O3   | 327.28942 |        |            |        |            |      | 1.85 * | 1.72 * |
|                                                  |            |           |        |            |        |            |      | 10-6   | 10-6   |
| <b>219</b> Cymorcin monoglucoside                | C16H24O7   | 329.15950 |        |            |        | 1.80 * 10- | 6    |        | 1.92 * |
|                                                  |            |           |        |            |        | 6          |      |        | 10-6   |
| <b>220</b> Methylgingerol                        | C18H28O4   | 331.18800 | 7.27 * | 7.37 * 10- | 6.72 * | 3.18 * 10- | 5    | 3.25 * | 3.20 * |
|                                                  |            |           | 10-6   | 5          | 10-6   | 5          | 10-6 | 10-6   | 10-6   |
| <b>221</b> Trihydroxy-9-octadecenoic acid        | C18H34O5   | 331.24790 | 1.78 * | 1.97 * 10- | 2.36 * |            |      |        |        |
|                                                  |            |           | 10-5   | 2          | 10-2   |            |      |        |        |
| <b>222</b>                                       | C25H17N    | 332.14336 |        |            |        | 2.71 * 10- | 6    | 2.65 * | 3.19 * |
|                                                  |            |           |        |            |        | 6          | 10-6 | 10-6   | 10-6   |

---

| #   | Putative Annotation <sup>a</sup>              | Molecular Formula | Theo. m/z <sup>b</sup> | HA1 <sup>c</sup>        | HA2 <sup>c</sup>        | HA3 <sup>c</sup>        | Org1 <sup>c</sup>       | Org2 <sup>c</sup>       | Org3 <sup>c</sup>       |
|-----|-----------------------------------------------|-------------------|------------------------|-------------------------|-------------------------|-------------------------|-------------------------|-------------------------|-------------------------|
| 223 | Methyloctanedioylcarnitine                    | C16H29NO6         | 332.20679              |                         |                         |                         | 2.20 * 10 <sup>-5</sup> | 1.73 * 10 <sup>-6</sup> | 2.27 * 10 <sup>-4</sup> |
| 224 |                                               | C23H41N           | 332.33120              | 6.16 * 10 <sup>-7</sup> | 5.91 * 10 <sup>-7</sup> | 5.99 * 10 <sup>-7</sup> | 1.20 * 10 <sup>-8</sup> | 1.13 * 10 <sup>-8</sup> | 1.12 * 10 <sup>-8</sup> |
| 225 |                                               | C9H4N2O8S2        | 332.94818              | 6.42 * 10 <sup>-6</sup> | 4.99 * 10 <sup>-6</sup> | 5.02 * 10 <sup>-6</sup> |                         |                         |                         |
| 226 | Gingerol                                      | C17H26O4          | 333.14627              | 3.92 * 10 <sup>-3</sup> | 4.40 * 10 <sup>-1</sup> | 4.17 * 10 <sup>-2</sup> |                         |                         |                         |
| 227 |                                               | C17H26O5          | 333.16727              | 2.97 * 10 <sup>-7</sup> | 2.97 * 10 <sup>-7</sup> | 2.88 * 10 <sup>-7</sup> | 1.38 * 10 <sup>-7</sup> | 1.34 * 10 <sup>-7</sup> | 1.32 * 10 <sup>-7</sup> |
| 228 | Gibberellin A20                               | C19H24O5          | 333.16965              | 3.27 * 10 <sup>-5</sup> | 2.25 * 10 <sup>-2</sup> | 2.99 * 10 <sup>-2</sup> |                         |                         |                         |
| 229 |                                               | C25H19N           | 334.15899              |                         |                         |                         | 5.19 * 10 <sup>-6</sup> | 6.38 * 10 <sup>-6</sup> | 6.30 * 10 <sup>-6</sup> |
| 230 | Hydroxyoctanedioylcarnitine                   | C15H27NO7         | 334.18606              |                         |                         |                         | 1.74 * 10 <sup>-6</sup> | 1.75 * 10 <sup>-4</sup> | 1.73 * 10 <sup>-5</sup> |
| 231 |                                               | C16H31NO6         | 334.22244              | 1.10 * 10 <sup>-7</sup> | 1.07 * 10 <sup>-7</sup> | 1.07 * 10 <sup>-7</sup> | 2.64 * 10 <sup>-6</sup> | 2.45 * 10 <sup>-6</sup> | 2.86 * 10 <sup>-6</sup> |
| 232 |                                               | C17H25N3O4        | 336.19182              |                         |                         |                         | 2.31 * 10 <sup>-6</sup> | 2.13 * 10 <sup>-6</sup> | 2.16 * 10 <sup>-6</sup> |
| 233 | Propanol, 1-methylethylamino-tripropylphenoxy | C21H37NO2         | 336.28974              |                         |                         |                         | 1.86 * 10 <sup>-6</sup> | 1.68 * 10 <sup>-6</sup> | 1.58 * 10 <sup>-6</sup> |
| 234 | Hydroxymugineic acid                          | C12H20N2O9        | 337.12579              | 3.47 * 10 <sup>-5</sup> | 3.31 * 10 <sup>-6</sup> | 3.45 * 10 <sup>-6</sup> | 1.72 * 10 <sup>-6</sup> |                         | 1.88 * 10 <sup>-6</sup> |
| 235 | Hydroxysphingosine                            | C18H37NO3         | 338.26656              | 6.63 * 10 <sup>-5</sup> | 6.52 * 10 <sup>-2</sup> | 6.31 * 10 <sup>-2</sup> |                         |                         |                         |
| 236 | Docosenamide                                  | C22H43NO          | 338.34176              | 2.59 * 10 <sup>-5</sup> | 3.43 * 10 <sup>-5</sup> | 5.27 * 10 <sup>-5</sup> | 3.96 * 10 <sup>-7</sup> | 7.35 * 10 <sup>-7</sup> | 1.11 * 10 <sup>-8</sup> |
| 237 | Hydroxy-8-nor-2-fenchanone glucoside          | C15H24O7          | 339.14144              | 7.25 * 10 <sup>-6</sup> | 6.83 * 10 <sup>-5</sup> | 6.95 * 10 <sup>-6</sup> | 4.47 * 10 <sup>-5</sup> | 3.28 * 10 <sup>-5</sup> | 3.25 * 10 <sup>-5</sup> |
| 238 | Licochalcone A                                | C21H22O4          | 339.15766              | 6.98 * 10 <sup>-5</sup> | 1.90 * 10 <sup>-6</sup> | 1.59 * 10 <sup>-6</sup> |                         |                         |                         |
| 239 |                                               | C21H38O3          | 339.28940              |                         |                         |                         | 3.77 * 10 <sup>-7</sup> | 3.78 * 10 <sup>-7</sup> | 3.63 * 10 <sup>-7</sup> |
| 240 |                                               | C23H49N           | 340.39379              | 2.52 * 10 <sup>-6</sup> | 2.42 * 10 <sup>-6</sup> | 2.53 * 10 <sup>-6</sup> |                         |                         |                         |
| 241 | β-D-glucosaminy-1-4-beta-D-glucosamine        | C12H24N2O9        | 341.15710              | 5.61 * 10 <sup>-6</sup> | 5.73 * 10 <sup>-5</sup> | 5.94 * 10 <sup>-6</sup> | 3.97 * 10 <sup>-6</sup> | 3.72 * 10 <sup>-5</sup> | 3.27 * 10 <sup>-6</sup> |
| 242 | Glycyl-L-histidyl-L-lysine                    | C14H24N6O4        | 341.19348              | 3.13 * 10 <sup>-4</sup> | 2.84 * 10 <sup>-6</sup> | 2.62 * 10 <sup>-3</sup> |                         |                         |                         |
| 243 |                                               | C19H32O3S         | 341.21452              |                         |                         |                         | 7.64 * 10 <sup>-6</sup> | 6.37 * 10 <sup>-6</sup> | 6.31 * 10 <sup>-6</sup> |
| 244 |                                               | C18H38O4          | 341.26626              | 1.20 * 10 <sup>-7</sup> | 1.10 * 10 <sup>-7</sup> | 1.22 * 10 <sup>-7</sup> | 2.15 * 10 <sup>-6</sup> | 2.17 * 10 <sup>-6</sup> |                         |
| 245 | Oxo-heneicosanoic acid                        | C21H40O3          | 341.30502              |                         |                         | 2.29 * 10 <sup>-2</sup> | 1.90 * 10 <sup>-1</sup> | 1.25 * 10 <sup>-2</sup> | 1.13 * 10 <sup>-2</sup> |
| 246 | Pentyl-3-1-naphthoyl indole                   | C24H23NO          | 342.18521              |                         |                         |                         | 2.20 * 10 <sup>-</sup>  | 2.17 * 10 <sup>-</sup>  | 2.62 * 10 <sup>-</sup>  |

|                                                                                |             |           |                            |                         |                            |                         |                            |                            |
|--------------------------------------------------------------------------------|-------------|-----------|----------------------------|-------------------------|----------------------------|-------------------------|----------------------------|----------------------------|
|                                                                                |             |           |                            |                         |                            | 6                       | 10 <sup>-6</sup>           | 10 <sup>-5</sup>           |
| <b>247</b> Sodium decylbenzenesulfonate                                        | C16H25NaO3S | 343.13144 | 6.50 *<br>10 <sup>-5</sup> | 6.94 * 10 <sup>-5</sup> | 6.29 *<br>10 <sup>-5</sup> |                         |                            |                            |
| <b>248</b> N-Amino-oxadiazol-yl-ethylimidazo-d-pyridinyl methylpiperidin-amine | C16H22N8O   | 343.19895 | 3.43 *<br>10 <sup>-6</sup> | 2.61 * 10 <sup>-6</sup> | 2.74 *<br>10 <sup>-6</sup> |                         |                            |                            |
| <b>249</b>                                                                     | C19H38N2O3  | 343.29554 | 2.27 *<br>10 <sup>-7</sup> | 2.56 * 10 <sup>-7</sup> | 2.56 *<br>10 <sup>-7</sup> | 1.37 * 10 <sup>-7</sup> | 1.26 *<br>10 <sup>-7</sup> | 1.19 *<br>10 <sup>-7</sup> |
| <b>250</b> Decenedioylcarnitine                                                | C17H29NO6   | 344.20678 | 2.22 *<br>10 <sup>-5</sup> | 2.16 * 10 <sup>-5</sup> | 2.45 *<br>10 <sup>-6</sup> |                         |                            |                            |
| <b>251</b>                                                                     | C10H30N7O4P | 344.21695 | 2.33 *<br>10 <sup>-6</sup> | 2.85 * 10 <sup>-6</sup> | 2.37 *<br>10 <sup>-6</sup> |                         |                            |                            |
| <b>252</b> N-propyl arachidonoyl amine                                         | C23H39NO    | 346.31044 | 1.91 *<br>10 <sup>-5</sup> | 1.75 * 10 <sup>-2</sup> | 2.40 *<br>10 <sup>-1</sup> | 5.98 * 10 <sup>-2</sup> | 5.67 *<br>10 <sup>-2</sup> | 5.24 *<br>10 <sup>-2</sup> |
| <b>253</b> Mytilin B                                                           | C14H22N2O8  | 347.14651 | 2.35 *<br>10 <sup>-6</sup> | 2.19 * 10 <sup>-6</sup> | 2.84 *<br>10 <sup>-6</sup> |                         |                            |                            |
| <b>254</b> Arginyl-glycyl-aspartic acid                                        | C12H22N6O6  | 347.16764 | 3.39 *<br>10 <sup>-6</sup> | 3.27 * 10 <sup>-6</sup> | 3.36 *<br>10 <sup>-5</sup> |                         |                            |                            |
| <b>255</b>                                                                     | C19H41NO4   | 348.31087 |                            |                         |                            | 3.18 * 10 <sup>-6</sup> | 3.33 *<br>10 <sup>-6</sup> | 3.24 *<br>10 <sup>-6</sup> |
| <b>256</b>                                                                     | C23H41NO    | 348.32610 | 2.00 *<br>10 <sup>-6</sup> | 2.27 * 10 <sup>-6</sup> | 2.12 *<br>10 <sup>-6</sup> | 5.12 * 10 <sup>-6</sup> | 4.78 *<br>10 <sup>-6</sup> | 4.88 *<br>10 <sup>-6</sup> |
| <b>257</b> N-Carboxymethyl-hydroxysuccinoyl arginine                           | C12H20N4O8  | 349.13563 | 1.94 *<br>10 <sup>-6</sup> | 2.43 * 10 <sup>-5</sup> | 1.73 *<br>10 <sup>-6</sup> |                         |                            |                            |
| <b>258</b> Magnesium octanoate                                                 | C16H30MgO4  | 349.16217 | 3.89 *<br>10 <sup>-6</sup> | 3.29 * 10 <sup>-6</sup> | 3.49 *<br>10 <sup>-6</sup> |                         |                            |                            |
| <b>259</b> Hydroperoxy-octadecatrienoic acid                                   | C18H30O5    | 349.19854 | 2.87 *<br>10 <sup>-5</sup> | 2.82 * 10 <sup>-2</sup> | 3.20 *<br>10 <sup>-1</sup> |                         |                            |                            |

---

| #   | Putative Annotation <sup>a</sup>                                         | Molecular Formula | Theo. m/z <sup>b</sup> | HA1 <sup>c</sup>        | HA2 <sup>c</sup>        | HA3 <sup>c</sup>        | Org1 <sup>c</sup>       | Org2 <sup>c</sup>       | Org3 <sup>c</sup>       |
|-----|--------------------------------------------------------------------------|-------------------|------------------------|-------------------------|-------------------------|-------------------------|-------------------------|-------------------------|-------------------------|
| 260 |                                                                          | C17H32O7          | 349.22240              |                         |                         |                         | 6.43 * 10 <sup>-6</sup> | 9.18 * 10 <sup>-6</sup> | 9.45 * 10 <sup>-6</sup> |
| 261 | Coutaric acid                                                            | C18H27N3O4        | 350.20679              | 3.84 * 10 <sup>-5</sup> | 3.59 * 10 <sup>-6</sup> | 3.59 * 10 <sup>-6</sup> | 4.32 * 10 <sup>-4</sup> | 4.12 * 10 <sup>-5</sup> | 3.88 * 10 <sup>-5</sup> |
| 262 | Coumarin 6                                                               | C20H18N2O2S       | 351.11490              | 2.46 * 10 <sup>-5</sup> | 2.74 * 10 <sup>-6</sup> | 3.23 * 10 <sup>-6</sup> |                         | 1.70 * 10 <sup>-6</sup> |                         |
| 263 | trans-p-Menthane-1,7,8-triol 8-glucoside                                 | C16H30O8          | 351.20016              | 3.65 * 10 <sup>-6</sup> | 3.77 * 10 <sup>-6</sup> | 3.44 * 10 <sup>-6</sup> | 4.14 * 10 <sup>-6</sup> | 3.51 * 10 <sup>-6</sup> | 3.36 * 10 <sup>-6</sup> |
| 264 | Adamantylamide-alanyl-isoglutamine                                       | C18H30N4O3        | 351.23807              |                         |                         |                         |                         | 2.23 * 10 <sup>-6</sup> | 2.73 * 10 <sup>-4</sup> |
| 265 | MG(0:0/16:1(9Z)/0:0)                                                     | C19H36O4          | 351.25058              | 9.56 * 10 <sup>-4</sup> | 1.23 * 10 <sup>-2</sup> | 1.50 * 10 <sup>-1</sup> | 8.46 * 10 <sup>-2</sup> | 7.97 * 10 <sup>-2</sup> | 7.80 * 10 <sup>-1</sup> |
| 266 |                                                                          | C22H41NO2         | 352.32103              |                         |                         |                         | 6.87 * 10 <sup>-6</sup> | 7.24 * 10 <sup>-6</sup> | 6.80 * 10 <sup>-6</sup> |
| 267 |                                                                          | C9H4O9S3          | 352.90907              | 3.01 * 10 <sup>-6</sup> | 2.03 * 10 <sup>-6</sup> |                         |                         |                         |                         |
| 268 |                                                                          | C19H38O4          | 353.26625              | 3.47 * 10 <sup>-7</sup> | 4.01 * 10 <sup>-7</sup> | 3.50 * 10 <sup>-7</sup> | 4.48 * 10 <sup>-7</sup> | 4.26 * 10 <sup>-7</sup> | 4.23 * 10 <sup>-7</sup> |
| 269 | Ceriporic acid C                                                         | C21H36O4          | 353.26864              |                         |                         |                         | 1.76 * 10 <sup>-2</sup> | 1.65 * 10 <sup>-2</sup> | 1.64 * 10 <sup>-2</sup> |
| 270 |                                                                          | C22H43NO2         | 354.33668              |                         |                         | 1.71 * 10 <sup>-6</sup> | 5.56 * 10 <sup>-6</sup> | 5.59 * 10 <sup>-6</sup> | 6.26 * 10 <sup>-6</sup> |
| 271 | Neryl glucoside                                                          | C16H28O6          | 355.15257              | 2.26 * 10 <sup>-7</sup> | 1.86 * 10 <sup>-5</sup> | 1.78 * 10 <sup>-6</sup> |                         |                         |                         |
| 272 | Hydroxytridecane-1,2,3-tricarboxylate                                    | C16H28O7          | 355.17272              | 3.25 * 10 <sup>-5</sup> | 2.92 * 10 <sup>-2</sup> | 2.69 * 10 <sup>-2</sup> |                         |                         |                         |
| 273 | Ceriporic acid B                                                         | C21H38O4          | 355.28429              |                         |                         |                         | 7.72 * 10 <sup>-2</sup> | 7.39 * 10 <sup>-2</sup> | 7.11 * 10 <sup>-2</sup> |
| 274 | Tridecenoylcarnitine                                                     | C20H37NO4         | 356.27957              |                         |                         |                         | 2.20 * 10 <sup>-6</sup> | 2.74 * 10 <sup>-5</sup> | 2.82 * 10 <sup>-5</sup> |
| 275 | Amino-phenoxyphenylethylamino quinazoline                                | C22H20N4O         | 357.17189              |                         |                         |                         |                         | 1.57 * 10 <sup>-6</sup> | 1.55 * 10 <sup>-6</sup> |
| 276 |                                                                          | C18H38O5          | 357.26117              | 7.22 * 10 <sup>-6</sup> | 8.40 * 10 <sup>-6</sup> | 7.78 * 10 <sup>-6</sup> | 4.90 * 10 <sup>-6</sup> | 4.17 * 10 <sup>-6</sup> | 4.02 * 10 <sup>-6</sup> |
| 277 |                                                                          | C25H45N           | 360.36251              | 2.01 * 10 <sup>-6</sup> |                         | 1.69 * 10 <sup>-6</sup> | 3.66 * 10 <sup>-6</sup> | 4.21 * 10 <sup>-6</sup> | 3.84 * 10 <sup>-6</sup> |
| 278 |                                                                          | C26H21NO          | 364.16955              |                         |                         |                         | 2.72 * 10 <sup>-6</sup> | 2.73 * 10 <sup>-6</sup> | 2.97 * 10 <sup>-6</sup> |
| 279 | Hexose                                                                   | C12H22O11         | 365.10543              | 2.15 * 10 <sup>-5</sup> | 8.77 * 10 <sup>-2</sup> | 6.79 * 10 <sup>-2</sup> | 1.30 * 10 <sup>-1</sup> | 7.45 * 10 <sup>-2</sup> | 6.31 * 10 <sup>-2</sup> |
| 280 | Cyclopentylamino-8-methylaminopurin-9-yl-5-hydroxymethyloxolane-3,4-diol | C16H24N6O4        | 365.19348              | 3.68 * 10 <sup>-5</sup> | 3.87 * 10 <sup>-6</sup> | 3.73 * 10 <sup>-5</sup> |                         |                         |                         |
| 281 | Eicosanedioic acid                                                       | C20H38O4          | 365.26623              | 1.79 * 10 <sup>-5</sup> | 2.70 * 10 <sup>-1</sup> | 3.29 * 10 <sup>-2</sup> | 1.89 * 10 <sup>-2</sup> | 2.10 * 10 <sup>-1</sup> |                         |
| 282 |                                                                          | C26H23NO          | 366.18521              |                         |                         |                         | 1.77 * 10 <sup>-7</sup> | 2.01 * 10 <sup>-7</sup> | 2.13 * 10 <sup>-7</sup> |
| 283 | N-Acetylsphinganine                                                      | C20H41NO3         | 366.29789              | 2.45 * 10 <sup>-5</sup> | 2.18 * 10 <sup>-5</sup> | 2.35 * 10 <sup>-5</sup> |                         |                         |                         |



|                                         |            |           |                |                 |                |                 |                |                |
|-----------------------------------------|------------|-----------|----------------|-----------------|----------------|-----------------|----------------|----------------|
| <b>284</b> Daphnoretin methyl ether     | C20H14O7   | 367.08157 | 10-5<br>3.18 * | 6<br>2.64 * 10- | 10-5<br>2.39 * | 5.72 * 10-      | 6.56 *         | 5.43 *         |
| <b>285</b>                              | C18H32O6   | 367.20914 | 10-6<br>1.28 * | 5<br>1.64 * 10- | 10-5<br>1.61 * | 5<br>1.93 * 10- | 10-6<br>2.29 * | 10-6<br>2.28 * |
| <b>286</b> PGE2alpha dimethyl amine     | C22H41NO3  | 368.31592 | 10-7           | 7               | 10-7           | 6<br>2.59 * 10- | 10-6<br>2.10 * | 10-6<br>2.84 * |
| <b>287</b>                              | C25H53N    | 368.42510 | 6.17 *<br>10-6 | 5.34 * 10-<br>6 | 5.57 *<br>10-6 | 2.73 * 10-<br>6 | 2.10 *<br>10-1 | 2.44 *<br>10-2 |
| <b>288</b>                              | C15H32N2S4 | 369.15205 | 2.10 *<br>10-6 | 2.00 * 10-<br>6 | 2.54 *<br>10-6 |                 |                |                |
| <b>289</b> Mitraphylline                | C21H24N2O4 | 369.18088 | 2.11 *<br>10-3 | 1.79 * 10-<br>2 | 1.81 *<br>10-2 |                 | 1.93 *<br>10-2 |                |
| <b>290</b> Arginyl-prolyl-proline       | C16H28N6O4 | 369.22478 |                | 2.67 * 10-<br>6 | 2.43 *<br>10-6 |                 |                |                |
| <b>291</b>                              | C27H44     | 369.35162 |                |                 |                | 4.18 * 10-<br>6 | 7.75 *<br>10-6 | 1.05 *<br>10-7 |
| <b>292</b>                              | C23H48N2O  | 369.38397 | 9.63 *<br>10-6 | 8.55 * 10-<br>6 | 8.56 *<br>10-6 | 3.70 * 10-<br>6 | 3.84 *<br>10-6 | 3.63 *<br>10-6 |
| <b>293</b> cis-5-Tetradecenoylcarnitine | C21H39NO4  | 370.29519 |                |                 |                | 2.15 * 10-<br>2 | 2.20 *<br>10-1 | 1.96 *<br>10-2 |
| <b>294</b> Hydroxyyohimbine             | C21H26N2O4 | 371.19763 | 7.57 *<br>10-6 |                 |                |                 | 6.72 *<br>10-6 | 6.34 *<br>10-6 |
| <b>295</b> Sativic acid                 | C18H36O6   | 371.24041 | 1.46 *<br>10-5 | 1.55 * 10-<br>2 | 1.39 *<br>10-2 |                 |                |                |
| <b>296</b>                              | C21H41NO4  | 372.31088 |                |                 |                | 9.83 * 10-<br>6 | 1.10 *<br>10-7 | 1.12 *<br>10-7 |

---

| #   | Putative Annotation <sup>a</sup>                                      | Molecular Formula | Theo. m/z <sup>b</sup> | HA1 <sup>c</sup> | HA2 <sup>c</sup> | HA3 <sup>c</sup> | Org1 <sup>c</sup> | Org2 <sup>c</sup> | Org3 <sup>c</sup> |
|-----|-----------------------------------------------------------------------|-------------------|------------------------|------------------|------------------|------------------|-------------------|-------------------|-------------------|
| 297 |                                                                       | C22H45NO3         | 372.34725              |                  | 1.76 * 10-<br>6  |                  | 2.82 * 10-<br>6   | 2.41 *<br>10-6    | 2.74 * 10-<br>6   |
| 298 | Tetrahydrodeoxycorticosterone                                         | C21H34O3          | 373.21327              | 2.18 * 10-6      | 2.67 * 10-<br>6  | 2.76 *<br>10-6   | 3.01 * 10-<br>6   | 2.70 *<br>10-6    | 2.38 * 10-<br>6   |
| 299 | Deoxyoleandolide                                                      | C20H36O6          | 373.25847              | 1.68 * 10-5      |                  |                  |                   |                   |                   |
| 300 |                                                                       | C25H27NO2         | 374.21143              |                  |                  |                  | 7.02 * 10-<br>6   | 7.49 *<br>10-6    | 8.15 * 10-<br>6   |
| 301 |                                                                       | C21H43NO4         | 374.32651              |                  |                  |                  | 4.57 * 10-<br>6   | 5.89 *<br>10-6    | 5.44 * 10-<br>6   |
| 302 | Picrasin B                                                            | C21H28O6          | 377.19587              | 5.91 * 10-5      | 5.61 * 10-<br>2  | 4.47 *<br>10-2   |                   |                   |                   |
| 303 |                                                                       | C20H38N2OS        | 377.25976              |                  |                  |                  | 3.21 * 10-<br>6   | 3.83 *<br>10-6    | 3.24 * 10-<br>6   |
| 304 | Pentosidine                                                           | C17H26N6O4        | 379.20883              | 1.93 * 10-4      | 1.90 * 10-<br>1  | 2.16 *<br>10-2   |                   |                   |                   |
| 305 |                                                                       | C20H40N2OS        | 379.27534              |                  |                  |                  | 1.65 * 10-<br>6   | 1.82 *<br>10-6    | 1.80 * 10-<br>6   |
| 306 | MG(0:0/18:1(11Z)/0:0)                                                 | C21H40O4          | 379.28188              | 9.62 * 10-5      | 1.40 * 10-<br>1  | 1.40 *<br>10-1   | 4.98 * 10-<br>2   | 4.94 *<br>10-2    | 4.78 * 10-<br>2   |
| 307 |                                                                       | C20H42O6          | 379.30544              | 3.45 * 10-6      | 3.00 * 10-<br>6  | 3.55 *<br>10-6   | 6.96 * 10-<br>6   | 6.16 *<br>10-6    | 6.67 * 10-<br>6   |
| 308 | Arabinosylamino-glucosylamino-propanenitrile                          | C14H25N3O9        | 380.16448              |                  |                  |                  | 1.78 * 10-<br>5   | 2.72 *<br>10-6    | 2.66 * 10-<br>6   |
| 309 | N-palmitoyl threonine                                                 | C20H39NO4         | 380.27713              |                  | 1.77 * 10-<br>2  | 2.59 *<br>10-2   | 2.46 * 10-<br>2   | 2.18 *<br>10-2    | 2.80 * 10-<br>1   |
| 310 | Prenylcatechin                                                        | C20H22O6          | 381.13086              | 1.99 * 10-4      |                  |                  |                   |                   |                   |
| 311 |                                                                       | C15H25O9P         | 381.13091              | 1.99 * 10-6      | 1.81 * 10-<br>6  | 1.78 *<br>10-6   |                   |                   |                   |
| 312 | Egtazic acid                                                          | C14H24N2O10       | 381.15201              | 2.85 * 10-5      | 1.75 * 10-<br>5  | 1.76 *<br>10-6   |                   |                   |                   |
| 313 | Azido-methyl-dioxypyrimidin-yl oxolanyl methyl-amino-methylpentanoate | C16H24N6O5        | 381.18838              | 4.89 * 10-6      | 4.68 * 10-<br>6  | 4.61 *<br>10-6   | 2.75 * 10-<br>6   | 2.25 *<br>10-6    | 2.55 * 10-<br>6   |
| 314 | MG(0:0/18:0/0:0)                                                      | C21H42O4          | 381.29753              | 7.98 * 10-4      |                  |                  | 9.83 * 10-<br>6   | 1.07 *<br>10-7    | 1.09 * 10-<br>7   |
| 315 |                                                                       | C26H23NO2         | 382.18012              |                  |                  |                  |                   | 2.00 *<br>10-6    | 1.75 * 10-<br>6   |
| 316 |                                                                       | C16H27N7O4        | 382.21973              | 5.44 * 10-6      | 6.02 * 10-<br>6  |                  |                   |                   |                   |
| 317 | Enterodiol sulfate                                                    | C18H22O7S         | 383.11604              |                  |                  |                  | 6.47 * 10-<br>6   | 3.27 *<br>10-4    | 2.36 * 10-<br>5   |
| 318 |                                                                       | C24H27NO2         | 384.19342              | 2.08 * 10-7      | 3.09 * 10-<br>7  | 3.45 *<br>10-7   | 2.96 * 10-<br>6   | 2.56 *<br>10-6    | 2.71 * 10-<br>6   |
| 319 |                                                                       | C23H45NO3         | 384.34724              |                  | 1.66 * 10-<br>6  |                  | 5.96 * 10-<br>6   | 6.55 *<br>10-6    | 7.59 * 10-<br>6   |
| 320 |                                                                       | C18H36N6O3        | 385.29246              | 1.71 * 10-7      | 1.77 * 10-<br>7  | 1.71 *<br>10-7   | 3.49 * 10-<br>6   | 2.74 *<br>10-6    | 2.82 * 10-<br>6   |

|                                                              |             |           |             |                 |                |                 |                |                 |
|--------------------------------------------------------------|-------------|-----------|-------------|-----------------|----------------|-----------------|----------------|-----------------|
| <b>321</b> Vitamin D3                                        | C27H44O     | 385.34649 |             | 2.71 * 10-<br>2 | 3.14 *<br>10-2 | 2.52 * 10-<br>2 | 2.57 *<br>10-2 | 2.30 * 10-<br>1 |
| <b>322</b>                                                   | C23H48N2O2  | 385.37888 | 4.84 * 10-6 | 4.33 * 10-<br>6 | 4.18 *<br>10-6 | 1.74 * 10-<br>6 | 2.63 *<br>10-6 | 2.31 * 10-<br>6 |
| <b>323</b> Glycerol trihexanoate                             | C21H38O6    | 387.27412 |             | 2.42 * 10-<br>6 | 2.56 *<br>10-6 |                 |                |                 |
| <b>324</b>                                                   | C25H25NO3   | 388.19069 |             |                 |                | 4.70 * 10-<br>6 | 4.96 *<br>10-6 | 5.28 * 10-<br>6 |
| <b>325</b>                                                   | C12H34N7O5P | 388.24316 | 4.56 * 10-6 | 3.67 * 10-<br>6 | 4.36 *<br>10-6 |                 |                |                 |
| <b>326</b>                                                   | C22H45NO4   | 388.34215 | 2.35 * 10-6 | 2.15 * 10-<br>6 | 2.22 *<br>10-6 |                 |                |                 |
| <b>327</b> L-Pyroglutamyl-L-histidyl-3,3-dimethylprolinamide | C18H26N6O4  | 391.20912 | 2.88 * 10-6 | 2.49 * 10-<br>5 | 3.37 *<br>10-6 |                 |                |                 |
| <b>328</b> N-palmitoyl isoleucine                            | C22H43NO3   | 392.31351 | 7.15 * 10-3 | 5.86 * 10-<br>2 | 5.58 *<br>10-2 | 3.24 * 10-<br>2 | 3.30 *<br>10-1 | 3.62 * 10-<br>2 |
| <b>329</b> Glycylphenylalanylleucylglycine                   | C19H28N4O5  | 393.21326 |             | 2.14 * 10-<br>5 | 2.35 *<br>10-5 | 2.42 * 10-<br>4 | 2.69 *<br>10-5 | 2.68 * 10-<br>6 |
| <b>330</b> Docosanedioic acid                                | C22H42O4    | 393.29753 | 2.74 * 10-5 | 5.30 * 10-<br>1 |                | 3.34 * 10-<br>2 | 3.41 *<br>10-2 | 3.90 * 10-<br>1 |
| <b>331</b>                                                   | C21H42N2O3  | 393.30878 | 7.92 * 10-6 | 8.46 * 10-<br>6 | 7.51 *<br>10-6 |                 |                |                 |
| <b>332</b> Apiosyllotaustralin                               | C16H27NO10  | 394.16921 | 2.28 * 10-5 | 1.80 * 10-<br>6 |                |                 |                |                 |
| <b>333</b> Tylophorine                                       | C24H27NO4   | 394.20296 |             | 1.69 * 10-<br>6 | 1.93 *<br>10-5 |                 |                |                 |

---

| #   | Putative Annotation <sup>a</sup>                                    | Molecular Formula | Theo. m/z <sup>b</sup> | HA1 <sup>c</sup> | HA2 <sup>c</sup> | HA3 <sup>c</sup> | Org1 <sup>c</sup> | Org2 <sup>c</sup> | Org3 <sup>c</sup> |
|-----|---------------------------------------------------------------------|-------------------|------------------------|------------------|------------------|------------------|-------------------|-------------------|-------------------|
| 334 |                                                                     | C24H46N2O2        | 395.36323              | 2.16 *<br>10-6   | 2.60 * 10-<br>6  | 2.54 *<br>10-6   | 4.97 * 10-<br>6   | 4.52 *<br>10-6    | 4.54 *<br>10-6    |
| 335 | Etarotene                                                           | C25H32O2S         | 397.21972              | 1.98 *<br>10-6   | 2.80 * 10-<br>6  | 2.29 *<br>10-6   |                   |                   |                   |
| 336 | Benzoyl arginine nitroanilide                                       | C19H22N6O4        | 399.17878              | 2.48 *<br>10-5   | 1.94 * 10-<br>6  | 1.79 *<br>10-6   |                   |                   |                   |
| 337 | Hexanoyl-α-glucopyranose                                            | C18H32O8          | 399.19894              | 3.43 *<br>10-4   |                  |                  |                   |                   |                   |
| 338 |                                                                     | C23H46N2O3        | 399.35813              | 5.66 *<br>10-6   | 5.85 * 10-<br>6  | 5.84 *<br>10-6   | 2.42 * 10-<br>6   | 1.96 *<br>10-6    | 2.55 *<br>10-6    |
| 339 |                                                                     | C21H37NO4S        | 400.25164              |                  |                  |                  | 2.55 * 10-<br>6   | 2.53 *<br>10-6    | 1.60 *<br>10-6    |
| 340 | Palmitoylcarnitine                                                  | C23H45NO4         | 400.34214              | 4.57 *<br>10-4   | 3.86 * 10-<br>2  | 3.48 *<br>10-2   |                   | 1.55 *<br>10-2    | 1.56 *<br>10-2    |
| 341 |                                                                     | C19H31NO8         | 402.21227              |                  |                  |                  | 1.06 * 10-<br>7   | 9.40 *<br>10-6    | 9.19 *<br>10-6    |
| 342 |                                                                     | C23H47NO4         | 402.35781              | 6.56 *<br>10-7   | 6.22 * 10-<br>7  | 6.18 *<br>10-7   | 1.46 * 10-<br>7   | 1.42 *<br>10-7    | 1.42 *<br>10-7    |
| 343 |                                                                     | C11H32N7O7P       | 406.21738              |                  |                  |                  | 2.06 * 10-<br>6   | 2.80 *<br>10-6    | 1.77 *<br>10-6    |
| 344 | Adenosine, butylamino-N-cyclopentyl                                 | C19H30N6O4        | 407.24042              | 2.24 *<br>10-6   | 2.39 * 10-<br>6  | 1.95 *<br>10-6   |                   |                   |                   |
| 345 |                                                                     | C22H46O6          | 407.33675              | 3.34 *<br>10-6   | 3.74 * 10-<br>6  | 4.14 *<br>10-6   | 3.13 * 10-<br>6   | 2.74 *<br>10-6    | 2.27 *<br>10-6    |
| 346 |                                                                     | C28H25NO2         | 408.19577              |                  |                  |                  | 6.02 * 10-<br>6   | 4.66 *<br>10-6    | 4.66 *<br>10-6    |
| 347 | Pentadecanoylcarnitine                                              | C22H43NO4         | 408.30845              | 8.16 *<br>10-6   | 2.36 * 10-<br>5  | 3.38 *<br>10-7   | 3.92 * 10-<br>7   | 5.55 *<br>10-5    | 6.36 *<br>10-7    |
| 348 | Met-leu-phe                                                         | C20H31N3O4S       | 410.21138              |                  |                  |                  | 2.42 * 10-<br>5   | 1.69 *<br>10-5    |                   |
| 349 | Dimethoxypyridin-yl-ethoxy-methoxy-hexahydrophenanthridinol         | C23H28N2O5        | 413.20715              |                  | 5.29 * 10-<br>6  | 4.26 *<br>10-6   | 2.55 * 10-<br>6   | 3.44 *<br>10-6    | 1.91 *<br>10-6    |
| 350 |                                                                     | C24H38O4          | 413.26625              | 1.22 *<br>10-7   | 1.94 * 10-<br>7  | 2.36 *<br>10-7   | 4.42 * 10-<br>6   | 4.10 *<br>10-6    | 4.26 *<br>10-6    |
| 351 | MG(0:0/20:3(8Z,11Z,14Z/0:0)_                                        | C23H40O6          | 413.28977              |                  |                  | 1.99 *<br>10-5   | 1.63 * 10-<br>5   |                   |                   |
| 352 | MG(0:0/20:5(5Z,8Z,11Z,14Z,17Z)/0:0)                                 | C23H36O4          | 415.22452              |                  |                  | 5.54 *<br>10-2   |                   |                   | 4.88 *<br>10-2    |
| 353 | Amino-imidazolyl-propanoyl-benzamidoethylamino-methylpentanoic acid | C21H29N5O4        | 416.22791              | 2.13 *<br>10-7   | 2.27 * 10-<br>7  | 2.24 *<br>10-7   | 2.46 * 10-<br>7   | 2.41 *<br>10-7    | 2.27 *<br>10-7    |
| 354 |                                                                     | C24H49NO4         | 416.37348              | 4.33 *<br>10-6   |                  | 3.89 *<br>10-6   | 1.64 * 10-<br>6   |                   |                   |
| 355 | CPA_18:2_9Z,12Z_0:0_                                                | C21H37O6P         | 417.23945              | 1.67 *<br>10-6   |                  |                  |                   | 1.58 *<br>10-6    | 1.59 *<br>10-6    |
| 356 | Arachidonoylglycerol                                                | C23H38O4          | 417.24017              | 1.67 *<br>10-4   |                  |                  |                   | 1.58 *<br>10-2    | 1.59 *<br>10-2    |
| 357 | Phenylalanyl-prolyl-arginine                                        | C20H30N6O4        | 419.24038              | 2.47 *<br>10-6   | 1.95 * 10-<br>6  |                  |                   |                   |                   |

|                                          |            |           |                |                 |                |                 |                |                |
|------------------------------------------|------------|-----------|----------------|-----------------|----------------|-----------------|----------------|----------------|
| <b>358</b>                               | C22H40O6   | 423.27173 | 10-5<br>8.33 * | 5<br>1.66 * 10- | 1.90 *         | 1.76 * 10-      |                | 1.60 *         |
| <b>359</b> Calcidiol                     | C27H44O2   | 423.32335 | 10-6           | 7<br>3.10 * 10- | 10-7<br>3.59 * | 6               |                | 10-6           |
| <b>360</b> Hydroxymelatonin glucuronide  | C19H24N2O9 | 425.15708 | 1.87 *         | 1<br>2.57 * 10- | 10-2<br>2.26 * |                 |                |                |
| <b>361</b> Taraxinic acid glucosyl ester | C21H28O9   | 425.18196 | 10-5<br>1.86 * | 6<br>1.79 * 10- |                | 4.52 * 10-      | 3.57 *         | 4.25 *         |
| <b>362</b>                               | C30H32O2   | 425.24785 | 10-6           | 5               |                | 6<br>3.23 * 10- | 10-5<br>5.02 * | 10-5<br>6.89 * |
| <b>363</b>                               | C22H49O5P  | 425.33899 | 1.94 *         | 3.70 * 10-      | 3.85 *         |                 |                |                |
| <b>364</b> $\delta$ -Tocopherol          | C27H46O2   | 425.33900 | 10-6<br>1.94 * | 6               | 10-6           |                 |                |                |
| <b>365</b>                               | C27H56N2O  | 425.44655 | 10-5<br>7.16 * | 6.56 * 10-      | 5.92 *         |                 |                | 1.60 *         |
| <b>366</b> Mesprenone                    | C25H30O4S  | 427.19388 | 10-6<br>2.46 * | 6<br>2.81 * 10- | 10-6<br>2.76 * |                 |                | 10-6           |
| <b>367</b> Caesalpinin N                 | C23H32O6   | 427.20911 | 10-5<br>3.31 * | 5<br>5.70 * 10- | 10-6<br>4.76 * |                 |                |                |
| <b>368</b> Dihydroxyprostaglandin F1a    | C20H36O7   | 427.21009 | 10-5<br>3.31 * | 1<br>5.78 * 10- | 10-2<br>4.76 * |                 |                |                |
| <b>369</b> Leupeptin                     | C20H38N6O4 | 427.30273 | 10-6<br>2.22 * | 4<br>2.73 * 10- | 10-6<br>3.18 * |                 |                |                |
| <b>370</b>                               | C24H42O6   | 427.30541 | 10-3<br>2.22 * | 2<br>2.73 * 10- | 10-2<br>2.41 * | 1.84 * 10-      | 1.75 *         |                |
|                                          |            |           |                |                 | 10-6           | 6               | 10-6           |                |

---

| #   | Putative Annotation <sup>a</sup>                                                      | Molecular Formula | Theo. m/z <sup>b</sup> | HA1 <sup>c</sup> | HA2 <sup>c</sup> | HA3 <sup>c</sup> | Org1 <sup>c</sup> | Org2 <sup>c</sup> | Org3 <sup>c</sup> |
|-----|---------------------------------------------------------------------------------------|-------------------|------------------------|------------------|------------------|------------------|-------------------|-------------------|-------------------|
| 371 |                                                                                       | C25H50N2O3        | 427.38942              | 2.68 *<br>10-6   | 2.53 * 10-<br>6  | 1.74 *<br>10-6   |                   |                   |                   |
| 372 | Valyl-prolyl-glycyl-valyl-glycine                                                     | C19H33N5O6        | 428.24904              |                  |                  |                  | 1.84 * 10-<br>6   | 1.79 *<br>10-5    | 1.68 *<br>10-5    |
| 373 | Stearoylcarnitine                                                                     | C25H49NO4         | 428.37344              | 1.10 *<br>10-1   |                  |                  | 2.31 * 10-<br>6   | 1.90 *<br>10-6    | 1.90 *<br>10-6    |
| 374 |                                                                                       | C20H40N6O4        | 429.31867              | 2.22 *<br>10-7   | 2.21 * 10-<br>7  | 2.25 *<br>10-7   | 5.52 * 10-<br>6   | 4.21 *<br>10-6    | 4.73 *<br>10-6    |
| 375 | Hexadecanedioic acid<br>mono-carnitine ester                                          | C23H43NO6         | 430.31634              |                  |                  |                  | 1.62 * 10-<br>6   | 1.88 *<br>10-5    | 1.92 *<br>10-6    |
| 376 |                                                                                       | C25H51NO4         | 430.38910              | 4.35 *<br>10-7   | 4.02 * 10-<br>7  | 3.78 *<br>10-7   | 8.66 * 10-<br>6   | 8.92 *<br>10-6    | 8.14 *<br>10-6    |
| 377 |                                                                                       | C18H41NO10        | 432.28034              |                  |                  |                  | 7.33 * 10-<br>6   | 7.11 *<br>10-6    | 7.18 *<br>10-6    |
| 378 | Dimethoxyphenyl-2-hydroxyethylamino-7-2-<br>methoxyethyl-1,3-dimethylpurine-2,6-dione | C20H27N5O6        | 434.20176              |                  |                  |                  | 2.40 * 10-<br>5   | 2.14 *<br>10-6    | 2.53 *<br>10-6    |
| 379 | Tyrosyl-prolyl-arginine                                                               | C20H30N6O5        | 435.23533              | 2.32 *<br>10-6   | 2.09 * 10-<br>6  | 2.89 *<br>10-6   |                   |                   |                   |
| 380 |                                                                                       | C13H39N2O6PS2     | 437.18801              | 2.20 *<br>10-6   |                  | 1.70 *<br>10-6   |                   |                   |                   |
| 381 |                                                                                       | C24H30O6          | 437.19348              | 1.63 *<br>10-7   | 1.64 * 10-<br>7  | 1.56 *<br>10-7   | 8.35 * 10-<br>6   | 7.82 *<br>10-6    | 8.11 *<br>10-6    |
| 382 | Val-Arg-Tyr                                                                           | C20H32N6O5        | 437.25099              | 2.29 *<br>10-5   | 2.13 * 10-<br>5  | 2.73 *<br>10-5   |                   |                   |                   |
| 383 | Pangamic acid                                                                         | C20H40N2O8        | 437.28737              |                  | 3.45 * 10-<br>5  | 3.68 *<br>10-6   |                   |                   |                   |
| 384 | Calcitriol                                                                            | C27H44O3          | 439.31827              | 2.50 *<br>10-4   | 2.68 * 10-<br>2  | 3.29 *<br>10-2   |                   |                   |                   |
| 385 | Glycerol diacetate 1-oleate                                                           | C25H44O6          | 441.32110              |                  |                  |                  | 2.64 * 10-<br>5   | 2.14 *<br>10-4    | 1.74 *<br>10-6    |
| 386 |                                                                                       | C24H44N2O5        | 441.33231              | 3.14 *<br>10-6   | 3.24 * 10-<br>6  | 3.82 *<br>10-6   | 1.76 * 10-<br>6   | 2.16 *<br>10-6    | 1.81 *<br>10-6    |
| 387 | Tyrosyl-glycyl-glycyl-phenylalanyl                                                    | C22H26N4O6        | 443.19253              | 2.39 *<br>10-5   | 4.23 * 10-<br>5  | 3.56 *<br>10-6   | 4.37 * 10-<br>5   | 4.45 *<br>10-6    | 4.28 *<br>10-6    |
| 388 | PG(6:0/6:0)                                                                           | C18H35O10P        | 443.20406              | 3.33 *<br>10-3   | 2.84 * 10-<br>2  | 2.50 *<br>10-1   |                   |                   |                   |
| 389 | Carboxyethylthio-phenyloctyl phenyl<br>Propanoic acid                                 | C26H34O4S         | 443.22519              | 2.34 *<br>10-4   |                  |                  | 1.70 * 10-<br>5   |                   |                   |
| 390 |                                                                                       | C22H38N2O7        | 443.27516              | 1.83 *<br>10-6   | 1.85 * 10-<br>6  |                  | 1.71 * 10-<br>6   |                   |                   |
| 391 | Ascorbyl stearate                                                                     | C24H42O7          | 443.30034              |                  |                  |                  | 3.23 * 10-<br>5   | 2.69 *<br>10-6    | 2.97 *<br>10-5    |
| 392 |                                                                                       | C24H28O8          | 445.18572              |                  |                  |                  | 2.34 * 10-<br>6   | 2.17 *<br>10-6    | 2.03 *<br>10-6    |
| 393 |                                                                                       | C22H46O7          | 445.31359              | 1.87 *<br>10-7   | 1.86 * 10-<br>7  | 1.91 *<br>10-7   | 1.31 * 10-<br>7   | 1.25 *<br>10-7    | 1.19 *<br>10-7    |
| 394 |                                                                                       | C23H48N4O4        | 445.37485              |                  |                  | 2.53 *<br>10-7   | 3.38 * 10-<br>7   | 4.50 *<br>10-7    | 5.72 *<br>10-7    |

|                                              |              |           |                |                 |                |                 |                |                |
|----------------------------------------------|--------------|-----------|----------------|-----------------|----------------|-----------------|----------------|----------------|
|                                              |              |           |                |                 | 10-6           | 6               | 10-6           | 10-6           |
| <b>395</b> Azetidinecarboxylic acid          | C18H31N7O5   | 448.22792 | 1.39 *<br>10-7 | 1.37 * 10-<br>7 | 1.43 *<br>10-7 |                 | 5.23 *<br>10-6 | 3.71 *<br>10-6 |
| <b>396</b>                                   | C18H33N7O5   | 450.24354 | 2.51 *<br>10-6 | 3.37 * 10-<br>6 | 3.29 *<br>10-6 |                 |                |                |
| <b>397</b>                                   | C16H43N5O3S3 | 450.26011 |                |                 |                | 1.83 * 10-<br>6 | 1.58 *<br>10-6 |                |
| <b>398</b>                                   | C12H31N14O3P | 451.25136 | 2.10 *<br>10-6 | 2.18 * 10-<br>6 |                |                 |                |                |
| <b>399</b> Chaksine                          | C22H38N6O4   | 451.30273 |                | 2.38 * 10-<br>2 | 4.74 *<br>10-2 |                 |                |                |
| <b>400</b> Sorbitan stearate                 | C24H46O6     | 453.31868 |                | 2.00 * 10-<br>4 | 2.66 *<br>10-5 |                 |                |                |
| <b>401</b>                                   | C26H48N2O4   | 453.36870 | 1.64 *<br>10-6 | 1.97 * 10-<br>6 | 1.75 *<br>10-6 | 4.13 * 10-<br>6 | 2.99 *<br>10-6 | 3.62 *<br>10-6 |
| <b>402</b> Hydroxyhexadecanoylcarnitine      | C23H45NO5    | 454.29293 |                |                 |                | 1.10 * 10-<br>1 | 9.30 *<br>10-1 | 9.58 *<br>10-2 |
| <b>403</b> Oleoylglycerone phosphate         | C21H39O7P    | 457.23256 | 1.32 *<br>10-5 |                 | 1.35 *<br>10-2 | 4.20 * 10-<br>1 | 4.18 *<br>10-2 | 4.73 *<br>10-2 |
| <b>404</b> Lyso-arachidonoyl-phosphatidate   | C23H39O7P    | 459.25002 | 2.39 *<br>10-6 | 1.91 * 10-<br>5 | 2.43 *<br>10-6 | 1.90 * 10-<br>5 | 2.21 *<br>10-4 | 2.62 *<br>10-5 |
| <b>405</b> Gingerdiol-O-beta-glucopyranoside | C23H38O9     | 459.26003 | 5.12 *<br>10-6 | 5.89 * 10-<br>4 | 5.28 *<br>10-6 | 3.97 * 10-<br>5 | 4.13 *<br>10-6 | 3.66 *<br>10-6 |
| <b>406</b>                                   | C21H50N2S4   | 459.29285 | 1.93 *<br>10-6 | 2.33 * 10-<br>6 |                | 2.18 * 10-<br>6 | 2.06 *<br>10-6 | 1.74 *<br>10-6 |
| <b>407</b> Methylcysteine sulfoxide          | C22H37NO5S2  | 460.21775 | 1.93 *<br>10-4 | 2.57 * 10-<br>6 | 1.84 *<br>10-6 | 3.15 * 10-<br>6 | 2.66 *<br>10-6 | 2.67 *<br>10-6 |

| #   | Putative Annotation <sup>a</sup>                                   | Molecular Formula | Theo. m/z <sup>b</sup> | HA1 <sup>c</sup> | HA2 <sup>c</sup> | HA3 <sup>c</sup> | Org1 <sup>c</sup> | Org2 <sup>c</sup> | Org3 <sup>c</sup> |
|-----|--------------------------------------------------------------------|-------------------|------------------------|------------------|------------------|------------------|-------------------|-------------------|-------------------|
| 408 |                                                                    | C13H33N14O3P      | 465.26703              | 1.79 *<br>10-6   | 1.71 * 10-<br>6  |                  |                   |                   |                   |
| 409 | Diphenylmethyl-piperazinyl-hydroxypropoxy-1H-indole-2-carbonitrile | C29H30N4O2        | 467.24631              | 1.85 *<br>10-6   | 2.55 * 10-<br>6  | 2.17 *<br>10-5   |                   |                   |                   |
| 410 | Dukunolide D                                                       | C26H28O8          | 469.18337              |                  | 1.92 * 10-<br>6  | 1.75 *<br>10-6   |                   |                   | 1.52 *<br>10-6    |
| 411 | Lucidenic acid                                                     | C27H34O7          | 471.23631              | 4.47 *<br>10-6   | 7.59 * 10-<br>6  | 7.26 *<br>10-4   |                   |                   |                   |
| 412 |                                                                    | C24H42N2O7        | 471.30649              |                  | 1.93 * 10-<br>6  |                  | 1.76 * 10-<br>6   |                   | 1.88 *<br>10-6    |
| 413 |                                                                    | C18H29N15O        | 472.27522              |                  |                  |                  | 2.84 * 10-<br>6   | 2.52 *<br>10-6    | 3.76 *<br>10-6    |
| 414 | LysoPE(0:0/18:3(6Z,9Z,12Z))                                        | C23H42NO7P        | 476.27717              |                  |                  |                  | 4.60 * 10-<br>1   | 4.79 *<br>10-2    | 4.26 *<br>10-2    |
| 415 | Methyl cellulose                                                   | C20H38O11         | 477.23063              | 2.25 *<br>10-7   | 2.21 * 10-<br>7  | 2.29 *<br>10-6   | 1.66 * 10-<br>6   | 1.63 *<br>10-6    | 1.42 *<br>10-7    |
| 416 | LysoPE(0:0/18:2(9Z,12Z))                                           | C23H44NO7P        | 478.29138              |                  |                  |                  | 3.75 * 10-<br>6   | 1.63 *<br>10-6    | 3.46 *<br>10-6    |
| 417 | 2-Methoxy-estradiol-17b 3-glucuronide                              | C25H34O9          | 479.22521              |                  | 1.97 * 10-<br>6  | 1.71 *<br>10-6   | 2.20 * 10-<br>6   |                   | 1.90 *<br>10-6    |
| 418 |                                                                    | C27H70N6          | 479.57383              |                  | 1.87 * 10-<br>6  |                  |                   |                   |                   |
| 419 | Hydroxy-octadecenoylcarnitine                                      | C25H47NO5         | 480.30858              |                  |                  |                  | 1.42 * 10-<br>2   | 1.32 *<br>10-2    | 1.25 *<br>10-2    |
| 420 | Oxo-androsterone glucuronide                                       | C25H36O9          | 481.24212              | 1.83 *<br>10-6   |                  | 1.93 *<br>10-5   |                   |                   |                   |
| 421 |                                                                    | C20H42O11         | 481.26192              | 3.43 *<br>10-7   | 3.70 * 10-<br>7  | 3.64 *<br>10-7   | 2.19 * 10-<br>7   | 2.00 *<br>10-7    | 1.95 *<br>10-7    |
| 422 | Neoandrographolide                                                 | C26H40O8          | 481.27716              | 1.68 *<br>10-6   |                  | 1.91 *<br>10-6   |                   |                   |                   |
| 423 | Crustecdysone                                                      | C27H44O7          | 481.31354              | 2.20 *<br>10-5   | 4.11 * 10-<br>6  | 5.57 *<br>10-6   |                   |                   |                   |
| 424 | Hydroxy-octadecanoylcarnitine                                      | C25H49NO5         | 482.32423              |                  |                  |                  | 3.18 * 10-<br>2   | 3.26 *<br>10-2    | 3.20 *<br>10-1    |
| 425 | β-Hydroxyandrosterone-3-glucuronide                                | C25H38O9          | 483.25646              | 2.05 *<br>10-6   | 2.45 * 10-<br>6  | 2.38 *<br>10-6   |                   |                   |                   |
| 426 | N-Docosahexaenoyl Arginine                                         | C28H44N4O3        | 485.34782              | 2.13 *<br>10-5   |                  | 2.11 *<br>10-5   |                   |                   |                   |
| 427 |                                                                    | C10H11N6O7PS4     | 486.93823              |                  |                  |                  | 4.94 * 10-<br>6   | 4.87 *<br>10-6    | 4.65 *<br>10-6    |
| 428 | Austalide I                                                        | C27H34O8          | 487.23320              | 1.89 *<br>10-6   | 2.27 * 10-<br>6  | 2.13 *<br>10-6   | 4.84 * 10-<br>6   | 3.54 *<br>10-5    | 2.38 *<br>10-5    |
| 429 |                                                                    | C24H50O8          | 489.33980              | 1.95 *<br>10-7   | 1.85 * 10-<br>7  | 1.91 *<br>10-7   | 1.22 * 10-<br>7   | 1.21 *<br>10-7    | 1.20 *<br>10-7    |
| 430 | Austalide F                                                        | C26H34O9          | 491.22680              |                  | 1.72 * 10-<br>3  | 2.93 *<br>10-5   |                   |                   |                   |



|                                                                                   |              |           |                |                 |                |                 |                |                |
|-----------------------------------------------------------------------------------|--------------|-----------|----------------|-----------------|----------------|-----------------|----------------|----------------|
| <b>431</b> Epoxy-retinoyl-beta-D-glucuronide                                      | C26H36O9     | 493.24088 | 1.73 *<br>10-6 |                 | 1.92 *<br>10-5 |                 |                |                |
| <b>432</b>                                                                        | C32H48N2S    | 493.36111 | 1.86 *<br>10-6 |                 | 1.81 *<br>10-6 |                 |                | 1.92 *<br>10-6 |
| <b>433</b>                                                                        | C18H47N5O4S3 | 494.28644 |                |                 |                | 2.28 * 10-<br>6 | 1.85 *<br>10-6 | 2.26 *<br>10-6 |
| <b>434</b> Chenodeoxycholylthreonine                                              | C28H47NO6    | 494.34527 |                |                 |                | 1.79 * 10-<br>6 | 2.81 *<br>10-5 | 2.22 *<br>10-6 |
| <b>435</b>                                                                        | C13H31N14O5P | 495.24120 | 3.33 *<br>10-6 | 3.72 * 10-<br>6 | 4.43 *<br>10-6 |                 |                |                |
| <b>436</b> Ethoxy-epoxy-hydroxy-cyathen-al -xyloside                              | C27H42O8     | 495.29285 |                | 1.68 * 10-<br>6 | 2.29 *<br>10-5 |                 |                |                |
| <b>437</b>                                                                        | C26H9NO2S4   | 495.95891 | 5.93 *<br>10-6 | 6.82 * 10-<br>6 | 6.89 *<br>10-6 |                 |                |                |
| <b>438</b> Dihydroxy-2-hydroxyocta-dien-1-yl<br>cyclopentyl hept-5-enoylcarnitine | C27H45NO7    | 496.32857 |                |                 |                | 4.47 * 10-<br>5 | 3.48 *<br>10-5 | 3.87 *<br>10-6 |
| <b>439</b> Docosa-pentaenoyl carnitine                                            | C29H47NO4    | 496.33973 | 2.53 *<br>10-4 | 3.10 * 10-<br>1 | 3.29 *<br>10-2 | 8.32 * 10-<br>2 | 8.40 *<br>10-1 | 7.79 *<br>10-2 |
| <b>440</b>                                                                        | C22H44O12    | 501.29054 | 1.28 *<br>10-7 | 1.27 * 10-<br>7 |                |                 |                |                |
| <b>441</b>                                                                        | C19H54N2O2S5 | 503.28621 | 4.20 *<br>10-6 | 3.46 * 10-<br>6 | 2.43 *<br>10-6 | 2.23 * 10-<br>6 | 2.07 *<br>10-6 | 2.08 *<br>10-6 |
| <b>442</b> Germine                                                                | C27H43NO8    | 510.30614 |                |                 |                | 1.97 * 10-<br>2 |                | 1.71 *<br>10-2 |
| <b>443</b> LysoPE(0:0/20:0)                                                       | C25H52NO7P   | 510.35542 |                |                 |                | 2.14 * 10-<br>2 | 1.77 *<br>10-2 | 1.93 *<br>10-2 |
| <b>444</b> sialosyl-Tn saccharide                                                 | C19H32N2O14  | 513.19418 |                | 1.90 * 10-<br>6 | 2.82 *<br>10-4 |                 |                |                |

| #   | Putative Annotation <sup>a</sup>  | Molecular Formula | Theo. m/z <sup>b</sup> | HA1 <sup>c</sup>        | HA2 <sup>c</sup>        | HA3 <sup>c</sup>        | Org1 <sup>c</sup>       | Org2 <sup>c</sup>       | Org3 <sup>c</sup>       |
|-----|-----------------------------------|-------------------|------------------------|-------------------------|-------------------------|-------------------------|-------------------------|-------------------------|-------------------------|
| 445 |                                   | C32H64O4          | 513.48766              |                         |                         |                         | 1.78 * 10 <sup>-6</sup> | 1.92 * 10 <sup>-6</sup> | 2.03 * 10 <sup>-6</sup> |
| 446 | Taurocholic acid                  | C26H45NO7S        | 516.30144              |                         |                         |                         | 4.81 * 10 <sup>-6</sup> | 5.89 * 10 <sup>-4</sup> | 5.12 * 10 <sup>-6</sup> |
| 447 | LysoPC(18:3(6Z,9Z,12Z))           | C26H48NO7P        | 518.32412              |                         |                         |                         | 5.88 * 10 <sup>-2</sup> | 4.67 * 10 <sup>-2</sup> | 6.45 * 10 <sup>-2</sup> |
| 448 | LysoPC(0:0/18:2(9Z,12Z))          | C26H50NO7P        | 520.33754              |                         |                         |                         |                         | 1.81 * 10 <sup>-6</sup> | 1.73 * 10 <sup>-6</sup> |
| 449 | Chenodeoxycholyglutamic acid      | C29H47NO7         | 522.34410              |                         |                         |                         | 2.99 * 10 <sup>-6</sup> | 3.01 * 10 <sup>-6</sup> | 1.96 * 10 <sup>-6</sup> |
| 450 | LysoPC(18:1(11Z))                 | C26H52NO7P        | 522.35542              |                         | 1.79 * 10 <sup>-2</sup> |                         | 3.89 * 10 <sup>-2</sup> | 3.63 * 10 <sup>-2</sup> | 3.46 * 10 <sup>-2</sup> |
| 451 | Physangulide                      | C28H42O9          | 523.29125              |                         |                         |                         |                         | 2.13 * 10 <sup>-6</sup> | 1.94 * 10 <sup>-5</sup> |
| 452 | Deoxocucurbitacin I               | C30H44O6          | 523.30301              | 2.97 * 10 <sup>-3</sup> |                         |                         |                         |                         |                         |
| 453 | LysoPC(18:0/0:0)                  | C26H54NO7P        | 524.37107              |                         |                         |                         | 4.57 * 10 <sup>-2</sup> | 4.21 * 10 <sup>-2</sup> | 4.70 * 10 <sup>-1</sup> |
| 454 |                                   | C22H46O12         | 525.28812              | 3.31 * 10 <sup>-7</sup> | 3.34 * 10 <sup>-7</sup> | 3.63 * 10 <sup>-7</sup> | 2.33 * 10 <sup>-7</sup> | 2.08 * 10 <sup>-7</sup> | 2.10 * 10 <sup>-7</sup> |
| 455 | Phaseolus epsilon                 | C25H34O12         | 527.20988              |                         | 2.94 * 10 <sup>-6</sup> | 1.83 * 10 <sup>-6</sup> |                         |                         |                         |
| 456 | Territrem B                       | C29H34O9          | 527.22669              | 2.87 * 10 <sup>-6</sup> | 2.77 * 10 <sup>-6</sup> |                         |                         |                         |                         |
| 457 | Uscharidin                        | C29H38O9          | 531.25886              |                         | 4.32 * 10 <sup>-6</sup> |                         | 6.20 * 10 <sup>-6</sup> |                         | 6.70 * 10 <sup>-6</sup> |
| 458 |                                   | C25H58N2OS4       | 531.35048              |                         | 1.94 * 10 <sup>-6</sup> | 2.40 * 10 <sup>-6</sup> |                         |                         |                         |
| 459 |                                   | C26H54O9          | 533.36599              | 1.49 * 10 <sup>-7</sup> | 1.39 * 10 <sup>-7</sup> | 1.48 * 10 <sup>-7</sup> | 1.03 * 10 <sup>-7</sup> | 9.77 * 10 <sup>-6</sup> | 1.02 * 10 <sup>-7</sup> |
| 460 | Octadecanoyloxy hexadecenoic acid | C34H64O4          | 537.48773              |                         |                         |                         | 2.58 * 10 <sup>-6</sup> | 4.75 * 10 <sup>-6</sup> | 5.06 * 10 <sup>-6</sup> |
| 461 | Octadecanoyloxy-hexadecanoic acid | C34H66O4          | 539.50350              |                         |                         |                         | 2.18 * 10 <sup>-6</sup> | 3.52 * 10 <sup>-6</sup> | 4.25 * 10 <sup>-6</sup> |
| 462 |                                   | C32H49NO4S        | 544.34543              |                         |                         |                         | 2.47 * 10 <sup>-6</sup> |                         | 2.43 * 10 <sup>-6</sup> |
| 463 | PI(14:0/0:0)                      | C23H45O12P        | 545.27214              | 3.44 * 10 <sup>-6</sup> | 2.97 * 10 <sup>-6</sup> | 2.24 * 10 <sup>-6</sup> |                         |                         |                         |
| 464 |                                   | C15H34N18O2S      | 553.27256              | 4.62 * 10 <sup>-6</sup> | 4.19 * 10 <sup>-6</sup> | 5.43 * 10 <sup>-6</sup> | 8.32 * 10 <sup>-6</sup> |                         | 7.55 * 10 <sup>-6</sup> |
| 465 |                                   | C23H47N3O6P2S     | 556.27323              |                         |                         |                         | 4.34 * 10 <sup>-6</sup> | 3.64 * 10 <sup>-6</sup> | 4.38 * 10 <sup>-6</sup> |
| 466 | Enkephalin L                      | C28H37N5O7        | 556.27658              | Std                     | Std                     | Std                     | Std                     | Std                     | Std                     |
| 467 | Butirosina                        | C21H41N5O12       | 556.28069              | 2.41 * 10 <sup>-6</sup> | 2.03 * 10 <sup>-6</sup> | 2.96 * 10 <sup>-6</sup> | 4.26 * 10 <sup>-6</sup> | 3.29 * 10 <sup>-6</sup> | 2.79 * 10 <sup>-6</sup> |
| 468 |                                   | C31H51NOS2        | 556.30457              | 2.18 * 10 <sup>-6</sup> | 2.61 * 10 <sup>-6</sup> | 1.79 * 10 <sup>-6</sup> | 2.14 * 10 <sup>-6</sup> | 2.00 * 10 <sup>-6</sup> |                         |

|            |                                              |              |           |                |                 |                |                 |                |                |
|------------|----------------------------------------------|--------------|-----------|----------------|-----------------|----------------|-----------------|----------------|----------------|
| <b>469</b> | Coroglaucigenin-3-o-alpha-L-rhamnopyranoside | C29H44O9     | 559.28775 | 3.46 *<br>10-4 | 6.34 * 10-<br>2 | 7.28 *<br>10-2 |                 |                |                |
| <b>470</b> |                                              | C28H58O9     | 561.39727 | 1.11 *<br>10-7 | 1.04 * 10-<br>7 | 8.82 *<br>10-6 | 2.38 * 10-<br>6 | 2.43 *<br>10-6 | 2.28 *<br>10-6 |
| <b>471</b> | Linoleic acid dimer                          | C36H64O4     | 561.48771 |                |                 |                | 3.57 * 10-<br>6 | 6.90 *<br>10-6 | 7.09 *<br>10-6 |
| <b>472</b> |                                              | C30H67N5S2   | 562.49097 |                |                 |                | 3.28 * 10-<br>6 | 5.12 *<br>10-6 | 4.61 *<br>10-6 |
| <b>473</b> |                                              | C36H66O4     | 563.50337 |                |                 |                | 3.26 * 10-<br>6 | 6.22 *<br>10-6 | 8.02 *<br>10-6 |
| <b>474</b> |                                              | C25H33N13O3  | 564.29023 |                |                 |                | 3.57 * 10-<br>6 | 3.85 *<br>10-6 | 3.20 *<br>10-6 |
| <b>475</b> |                                              | C24H46O13    | 565.28304 | 2.95 *<br>10-7 | 2.98 * 10-<br>7 | 2.98 *<br>10-7 | 2.53 * 10-<br>7 | 2.21 *<br>10-7 | 2.26 *<br>10-7 |
| <b>476</b> | Oleic acid, dimer                            | C36H68O4     | 565.51896 |                |                 |                |                 | 3.05 *<br>10-6 | 3.67 *<br>10-6 |
| <b>477</b> | Hordatine A                                  | C28H38N8O5   | 567.30114 | 1.76 *<br>10-5 |                 |                |                 | 1.93 *<br>10-5 | 1.64 *<br>10-5 |
| <b>478</b> |                                              | C32H61NO7    | 572.45211 | 3.99 *<br>10-6 | 4.09 * 10-<br>6 | 4.60 *<br>10-6 |                 |                |                |
| <b>479</b> |                                              | C26H64N6O3S2 | 573.45528 | 2.40 *<br>10-6 |                 | 1.80 *<br>10-6 |                 |                |                |
| <b>480</b> |                                              | C35H63N3OS   | 574.47651 | 1.74 *<br>10-6 |                 |                |                 |                | 1.61 *<br>10-6 |
| <b>481</b> |                                              | C25H62N6O4S2 | 575.43485 |                |                 |                |                 | 2.06 *<br>10-6 | 3.19 *<br>10-6 |

| #   | Putative Annotation <sup>a</sup>                                               | Molecular Formula | Theo. m/z <sup>b</sup> | HA1 <sup>c</sup>        | HA2 <sup>c</sup>        | HA3 <sup>c</sup>        | Org1 <sup>c</sup>       | Org2 <sup>c</sup>       | Org3 <sup>c</sup>       |
|-----|--------------------------------------------------------------------------------|-------------------|------------------------|-------------------------|-------------------------|-------------------------|-------------------------|-------------------------|-------------------------|
| 482 | Methoxy-hydroxy-all-trans-hexaprenylbenzoate                                   | C38H55O4          | 576.41606              | 1.76 * 10 <sup>-6</sup> |                         |                         |                         | 1.78 * 10 <sup>-6</sup> |                         |
| 483 |                                                                                | C26H46N14         | 577.39219              | 1.16 * 10 <sup>-7</sup> | 1.34 * 10 <sup>-7</sup> | 1.29 * 10 <sup>-7</sup> | 8.70 * 10 <sup>-6</sup> | 7.93 * 10 <sup>-6</sup> | 7.99 * 10 <sup>-6</sup> |
| 484 |                                                                                | C35H48O5S         | 581.32975              | 1.89 * 10 <sup>-6</sup> | 3.96 * 10 <sup>-6</sup> | 3.13 * 10 <sup>-6</sup> |                         | 1.73 * 10 <sup>-6</sup> |                         |
| 485 |                                                                                | C19H47N13S4       | 586.30329              |                         |                         |                         | 3.19 * 10 <sup>-6</sup> | 3.92 * 10 <sup>-6</sup> | 3.95 * 10 <sup>-6</sup> |
| 486 | Chlorophyll c                                                                  | C35H32N4O5        | 589.24434              |                         | 1.96 * 10 <sup>-5</sup> | 1.83 * 10 <sup>-6</sup> |                         |                         |                         |
| 487 |                                                                                | C21H54N8O5S3      | 595.34529              | 1.84 * 10 <sup>-6</sup> | 2.46 * 10 <sup>-6</sup> | 2.92 * 10 <sup>-6</sup> |                         |                         |                         |
| 488 | Proanthocyanidin A2                                                            | C30H24O12         | 599.11600              | 1.76 * 10 <sup>-5</sup> | 3.70 * 10 <sup>-1</sup> | 2.78 * 10 <sup>-2</sup> |                         |                         |                         |
| 489 |                                                                                | C23H40N5O10P      | 600.24044              | 3.60 * 10 <sup>-7</sup> | 3.18 * 10 <sup>-7</sup> | 2.89 * 10 <sup>-7</sup> |                         |                         |                         |
| 490 |                                                                                | C24H63N3O7P2S     | 600.39344              |                         |                         | 2.73 * 10 <sup>-6</sup> | 2.30 * 10 <sup>-6</sup> |                         |                         |
| 491 |                                                                                | C29H44N8S3        | 601.29242              | 7.50 * 10 <sup>-6</sup> | 6.84 * 10 <sup>-6</sup> | 7.20 * 10 <sup>-6</sup> |                         |                         |                         |
| 492 |                                                                                | C38H50S3          | 603.31485              | 3.08 * 10 <sup>-6</sup> | 3.79 * 10 <sup>-6</sup> | 3.58 * 10 <sup>-6</sup> |                         |                         |                         |
| 493 |                                                                                | C20H60N8O6S3      | 605.38708              | 2.17 * 10 <sup>-6</sup> | 2.61 * 10 <sup>-6</sup> | 2.44 * 10 <sup>-6</sup> |                         |                         |                         |
| 494 | Chymostatin                                                                    | C31H41N7O6        | 608.31652              |                         |                         |                         | 2.54 * 10 <sup>-5</sup> | 2.53 * 10 <sup>-6</sup> | 2.23 * 10 <sup>-5</sup> |
| 495 | 1-hexadecanoyl-2-(4-oxo-6-carboxy-5E-hexenoyl)sn-glycero-3-phosphoethanolamine | C28H50NO11P       | 608.32072              |                         |                         |                         | 2.03 * 10 <sup>-6</sup> | 3.23 * 10 <sup>-6</sup> | 3.02 * 10 <sup>-6</sup> |
| 496 |                                                                                | C26H50O14         | 609.30922              | 2.36 * 10 <sup>-7</sup> | 2.46 * 10 <sup>-7</sup> | 2.65 * 10 <sup>-7</sup> | 1.83 * 10 <sup>-7</sup> | 1.78 * 10 <sup>-7</sup> | 1.70 * 10 <sup>-7</sup> |
| 497 | Hydroxyvitamin D2 25-(beta-glucuronide)                                        | C34H52O8          | 611.35544              | 1.90 * 10 <sup>-5</sup> |                         |                         |                         |                         |                         |
| 498 | _D-Met2, Pro5_-enkephalinamide                                                 | C30H40N6O6S       | 613.28097              |                         |                         | 1.88 * 10 <sup>-6</sup> | 2.14 * 10 <sup>-6</sup> | 2.32 * 10 <sup>-6</sup> | 2.11 * 10 <sup>-6</sup> |
| 499 |                                                                                | C26H54O14         | 613.34053              | 1.24 * 10 <sup>-7</sup> | 1.24 * 10 <sup>-7</sup> | 1.31 * 10 <sup>-7</sup> | 9.36 * 10 <sup>-6</sup> | 8.40 * 10 <sup>-6</sup> | 6.36 * 10 <sup>-6</sup> |
| 500 |                                                                                | C23H43N13OS3      | 614.29481              |                         |                         |                         | 1.81 * 10 <sup>-6</sup> |                         | 1.67 * 10 <sup>-6</sup> |
| 501 |                                                                                | C24H55N14O3P      | 619.43887              | 3.62 * 10 <sup>-6</sup> | 3.14 * 10 <sup>-6</sup> | 3.62 * 10 <sup>-6</sup> |                         |                         | 1.93 * 10 <sup>-6</sup> |
| 502 |                                                                                | C14H28N10O10S4    | 625.09456              | 7.54 * 10 <sup>-7</sup> | 8.20 * 10 <sup>-7</sup> | 8.50 * 10 <sup>-7</sup> | 1.04 * 10 <sup>-8</sup> | 1.05 * 10 <sup>-8</sup> | 1.05 * 10 <sup>-8</sup> |
| 503 | Prunin 6''-O-gallate                                                           | C28H26O14         | 625.09541              | 7.54 * 10 <sup>-3</sup> |                         |                         |                         |                         |                         |
| 504 |                                                                                | C24H17N7O14       | 628.09084              |                         |                         |                         | 2.04 * 10 <sup>-6</sup> |                         | 1.89 * 10 <sup>-6</sup> |
| 505 | Peridinin                                                                      | C39H50O7          | 631.36293              | 2.83 * 10 <sup>-4</sup> | 2.33 * 10 <sup>-2</sup> |                         |                         |                         | 7.24 * 10 <sup>-2</sup> |

|                                                    |                |           |                         |                         |                         |                         |                         |                         |
|----------------------------------------------------|----------------|-----------|-------------------------|-------------------------|-------------------------|-------------------------|-------------------------|-------------------------|
| <b>506</b>                                         | C25H52N4O10S2  | 633.31978 | 2.66 * 10 <sup>-6</sup> |                         | 2.88 * 10 <sup>-6</sup> |                         |                         |                         |
| <b>507</b>                                         | C38H64O5S      | 633.45471 |                         | 2.60 * 10 <sup>-6</sup> | 2.80 * 10 <sup>-6</sup> |                         | 1.76 * 10 <sup>-6</sup> |                         |
| <b>508</b>                                         | C21H6N4O10S5   | 634.87590 | 7.26 * 10 <sup>-6</sup> | 4.21 * 10 <sup>-6</sup> | 4.39 * 10 <sup>-6</sup> |                         |                         |                         |
| <b>509</b> Isaridin F                              | C34H51N5O7     | 642.38401 |                         |                         |                         | 1.93 * 10 <sup>-6</sup> | 2.67 * 10 <sup>-6</sup> | 2.18 * 10 <sup>-6</sup> |
| <b>510</b> PE(14:1/15:0(9Z))                       | C34H66NO8P     | 648.46206 |                         |                         |                         | 4.72 * 10 <sup>-5</sup> | 5.44 * 10 <sup>-6</sup> | 5.43 * 10 <sup>-5</sup> |
| <b>511</b> Milbemycin alpha10                      | C37H49NO9      | 652.34739 |                         |                         |                         | 2.36 * 10 <sup>-5</sup> | 3.24 * 10 <sup>-6</sup> | 3.38 * 10 <sup>-5</sup> |
| <b>512</b> Cer_d(20:1/22:6(5Z,7Z,10Z,13Z,16Z,19Z)) | C42H71NO4      | 654.54369 |                         |                         |                         |                         | 1.77 * 10 <sup>-5</sup> | 1.73 * 10 <sup>-5</sup> |
| <b>513</b> Oleanoic acid 3-O-glucuronide           | C36H56O9       | 655.38165 | 1.54 * 10 <sup>-5</sup> |                         |                         |                         |                         |                         |
| <b>514</b>                                         | C24H70N8O6S3   | 663.46539 | 2.32 * 10 <sup>-6</sup> | 2.63 * 10 <sup>-6</sup> | 2.84 * 10 <sup>-6</sup> | 1.84 * 10 <sup>-6</sup> |                         |                         |
| <b>515</b>                                         | C30H54N14O2    | 665.44463 | 5.00 * 10 <sup>-6</sup> | 5.80 * 10 <sup>-6</sup> | 6.50 * 10 <sup>-6</sup> | 4.62 * 10 <sup>-6</sup> | 4.40 * 10 <sup>-6</sup> | 4.40 * 10 <sup>-6</sup> |
| <b>516</b>                                         | C25H43N5O10P2S | 668.22793 | 6.01 * 10 <sup>-6</sup> | 4.23 * 10 <sup>-6</sup> | 3.59 * 10 <sup>-6</sup> |                         |                         |                         |
| <b>517</b> O-α-D-Galactopyranosylciceritol         | C25H44O21      | 681.24627 |                         |                         |                         | 1.73 * 10 <sup>-6</sup> |                         | 1.66 * 10 <sup>-6</sup> |
| <b>518</b> PA_12:0_PGF2alpha                       | C35H63O11P     | 691.41751 |                         | 1.79 * 10 <sup>-6</sup> | 1.86 * 10 <sup>-6</sup> |                         |                         |                         |

---

| #   | Putative Annotation <sup>a</sup> | Molecular Formula | Theo. m/z <sup>b</sup> | HA1 <sup>c</sup>        | HA2 <sup>c</sup>        | HA3 <sup>c</sup>        | Org1 <sup>c</sup>       | Org2 <sup>c</sup>       | Org3 <sup>c</sup>       |
|-----|----------------------------------|-------------------|------------------------|-------------------------|-------------------------|-------------------------|-------------------------|-------------------------|-------------------------|
| 519 |                                  | C24H60N12O9S      | 693.43991              |                         | 1.71 * 10 <sup>-6</sup> | 2.27 * 10 <sup>-6</sup> |                         |                         |                         |
| 520 | HMBOA dihexose                   | C27H39NO20        | 698.21730              | 3.43 * 10 <sup>-6</sup> | 4.02 * 10 <sup>-6</sup> | 3.24 * 10 <sup>-6</sup> |                         |                         |                         |
| 521 | Leucomycin                       | C35H59NO13        | 702.40851              | 2.17 * 10 <sup>-6</sup> | 2.58 * 10 <sup>-6</sup> |                         |                         |                         | 1.84 * 10 <sup>-6</sup> |
| 522 | PE(14:1(9Z)/20:4(5Z,8Z,11Z,14Z)) | C39H68NO8P        | 710.47399              | 2.13 * 10 <sup>-6</sup> | 1.92 * 10 <sup>-6</sup> |                         |                         |                         |                         |
| 523 | Strophanthin                     | C36H54O14         | 711.35770              | 2.09 * 10 <sup>-6</sup> | 2.97 * 10 <sup>-6</sup> | 2.14 * 10 <sup>-6</sup> |                         |                         |                         |
| 524 | PA(16:0/PGF1alpha)               | C39H73O11P        | 749.49660              | 1.63 * 10 <sup>-6</sup> |                         |                         |                         | 1.62 * 10 <sup>-5</sup> |                         |
| 525 | DG_22:0_PGF2alpha_0:0_           | C45H82O8          | 751.60888              |                         |                         |                         | 1.62 * 10 <sup>-6</sup> |                         | 1.54 * 10 <sup>-6</sup> |
| 526 | PC(18:0/20:3(5Z,8Z,11Z))         | C46H84NO9P        | 826.59452              |                         | 2.43 * 10 <sup>-6</sup> | 2.62 * 10 <sup>-5</sup> |                         |                         |                         |

**a** Cer Ceramide; DG Diacylglycerol; MG Monoacylglycerol; PA Phosphatidic acid; PC Phosphatidylcholine; PE Phosphatidylethanolamine; PG Glycerophospholipids; PGE2 Prostaglandin E2; PI Phosphatidylinositol

**b** Theoretical mass

**c** HA stands for hydroalcoholic extract and Org stands for organic extract.
